# Supplementary material for: Shared Signature Dynamics Tempered by Local Fluctuations Enables Fold Adaptability and Specificity
Source: Mol Biol Evol. 2019 Apr 27;36(9):2053–68. doi: 10.1093/molbev/msz102 (PMC6736388; doi:10.1093/molbev/msz102)
Supplement: msz102_Supplementary_Data [file msz102_supplementary_data.zip]

Archive with 11 entries (11 files):
- Movie 1 - PBP-mode1.mov
- Movie 2 - PBP-mode2.mov
- Movie 3 - LeuT_mode1.mov
- Movie 4 - LeuT_mode2.mov
- Movie 5 - LeuT_mode3.mov
- Movie 6 - LeuT2BetP.mov
- SignDy-SI.pdf
- Table S1-LeuT.xlsx
- Table S2-PBP-1.xlsx
- Table S3-TIM barrel.xlsx
- Table S4-CATH.xlsx
