# Supplementary material for: Shared Signature Dynamics Tempered by Local Fluctuations Enables Fold Adaptability and Specificity
Source: Mol Biol Evol. 2019 Apr 27;36(9):2053–68. doi: 10.1093/molbev/msz102 (PMC6736388; doi:10.1093/molbev/msz102)
Supplement: msz102_Supplementary_Data [file msz102_supplementary_data.zip › Table S1-LeuT.xlsx]

## Sheet: LeuT
Supplementary Table S1. LeuT fold structures included in SignDy analysis
Subfamily	Index (a)	PDB chain (b)	Protein name and description	N (c)	Seq Id (%) (d)	RMSD (Å) (d)	CATH ID (e)
Leucine transporter (LeuT)	1	3qs6A	LeuT mutant F259V, I359Q bound to sodium and L- tryptophan	373	99.4638	0.352646	-
	2	3qs5A	LeuT mutant I359Q bound to sodium and L- tryptophan	373	99.7319	0.288001	-
	3	4hmkA	LeuT mutant E290S with bound Br	373	99.7319	0.30586	-
	4	3usmA	LeuT bound to L-selenomethionine	373	100	0.355616	-
	5	3uslA	LeuT bound to L-selenomethionine	373	100	0.346899	-
	6	3usgA	LeuT bound to L-leucine	373	100	0.345873	-
	7	3uskA	LeuT bound to L-leucine	373	100	0.343464	-
	8	3usoA	LeuT bound to L-selenomethionine	373	100	0.335714	-
	9	3usjA	LeuT bound to L-leucine	373	100	0.34499	-
	10	4fxzA	LeuT mutant F253A bound to L-leucine	373	99.7319	0.376607	-
	11	4fy0A	LeuT mutant F253A bound to L-selenomethionine	373	99.7319	0.418486	-
	12	3usiA	LeuT bound to L-Leucine	373	100	0.264986	-
	13	2a65A	LeuT in outward-facing occluded state	373	100	0	-
	14	3tu0A	LeuT mutant T355V, S354A, K288A in complex with alanine and sodium	373	99.1957	0.339552	-
	15	3gjcA	LeuT mutant E290S with bound OG	373	99.7319	0.516561	-
	16	3qs4A	LeuT mutant F259V bound to sodium and L-tryptophan	373	99.7319	1.19668	-
	17	3f3aA	LeuT bound to L-tryptophan and sodium	373	100	1.18094	-
	18	4mmfA	LeuT mutant in complex with mazindol	373	98.9276	1.2907	-
	19	4mmeA	LeuT mutant in complex with mazindol	373	98.6595	1.27385	-
	20	4mmcA	LeuT mutant in complex with Desvenlafaxine	373	98.6595	1.23344	-
	21	4mmdA	LeuT mutant in complex with (S)-Duloxetine	373	98.6595	1.34486	-
	22	4mmbA	LeuT mutant in complex with sertraline	373	98.6595	1.3195	-
	23	4mm7A	LeuT mutant in complex with desvenlafaxine	373	96.7828	1.19873	-
	24	4mm6A	LeuT mutant in complex with (S)-duloxetine	373	96.7828	1.24177	-
	25	4mm8A	LeuT mutant in complex with (R)-fluoxetine	373	96.7828	1.21493	-
	26	4mm5A	LeuT mutant in complex with sertraline	373	96.7828	1.23698	-
	27	4mmaA	LeuT mutant in complex with clomipramine	373	96.7828	1.27154	-
	28	4mm9A	LeuT mutant in complex with fluvoxamine	373	96.7828	1.28128	-
	29	4mm4A	LeuT mutant in complex with paroxetine	373	96.7828	1.30667	-
	30	3tt1A	LeuT in the outward-open conformation in complex with Fab	373	99.4638	1.21467	-
Dopamine transporter (DAT)	31	4xp9C	DAT from Drosophila bound to psychostimulant d-amphetamine	365	25.7373	2.39266	-
	32	4xnxA	DAT from Drosophila in complex with reboxetine	365	25.7373	2.42536	-
	33	4xnuA	DAT from Drosophila in complex with nisoxetine	365	25.7373	2.41647	-
	34	4m48A	DAT from Drosophila	365	25.7373	2.4407	-
	35	4xp4A	DAT from Drosophila in complex with cocaine	365	25.7373	2.42161	-
	36	4xp1A	DAT from Drosophila bound to neurotransmitter dopamine	365	25.7373	2.39473	-
	37	4xp6A	DAT from Drosophila bound to psychostimulant methamphetamine	365	25.7373	2.34352	-
	38	4xpbA	DAT mutant (D121G/S426M) from Drosophila bound to cocaine	364	25.7373	2.46107	-
	39	4xpgA	DAT mutant (D121G/S426M) from Drosophila bound to β-CFT or Win35428	364	25.7373	2.4707	-
	40	4xpfA	DAT mutant (D121G/S426M) from Drosophila bound to RTI-55	364	25.7373	2.49482	-
	41	4xp5A	DAT from Drosophila bound to cocaine analogue-RTI55	365	25.7373	2.40014	-
	42	4xptA	DAT mutant from Drosophila in complex with 3,4-dichlorophen ethylamine	364	25.7373	2.28954	-
	43	4xphA	DAT mutant from Drosophila bound to 3,4-dichlorophenethylamine	364	25.7373	2.28607	-
	44	4xpaA	DAT from Drosophila bound to 3,4-dichlorophenethylamine	365	25.7373	2.2476	-
MhsT	45	4us3A	MhsT in the inward-facing occluded state	358	30.0268	2.55302	-
	46	4us4A	MhsT in the inward-facing occluded state	358	30.0268	2.7916	-
LeuT	47	3tt3A	LeuT in the inward-open conformation in complex with Fab	373	98.9276	2.94302	-
AdiC	48	5j4nA	AdiC from E.coli in complex with agmatine	338	9.65147	4.15575	-
	49	5j4iA	AdiC from E.coli	338	9.65147	4.17817	-
	50	3ob6A	AdiC mutant N101A in the open-to-out Arg bound conformation	333	9.65147	4.36658	-
	51	3lrcA	AdiC from E.coli	319	9.38338	4.17032	-
	52	3lrbA	AdiC from E.coli	319	9.38338	4.16565	-
	53	3ncyA	AdiC in complex with a Fab fragment	330	9.91957	4.62284	-
	54	3l1lA	AdiC bound to Arg from E.coli	328	9.38338	4.5749	-
Mhp1	55	4d1dA	Mhp1 with the inhibitor 5-(2-naphthylmethyl)-l-hydantoin	333	10.7239	4.36704	1.10.4160.10
	56	2jlnA	Mhp1	333	10.7239	4.41663	1.10.4160.10
	57	4d1bA	Mhp1 in a closed conformation with benzyl-hydantoin	333	10.7239	4.49173	1.10.4160.10
	58	4d1aA	Mhp1 in a closed conformation with indolylmethyl-hydantoin	333	10.7239	4.49167	1.10.4160.10
	59	4d1cA	Mhp1 in a closed conformation with bromovinylhydantoin bound	333	10.7239	4.47457	1.10.4160.10
	60	2x79A	Mhp1 in the inward-facing conformation	317	10.7239	5.47265	1.10.4160.10
Betaine permeation transporter (BetP)	61	4dojB	BetP in the outward-facing conformation	339	10.4558	5.4659	-
	62	4dojA	BetP in the outward-facing conformation	339	10.4558	5.50815	1.20.5.430
	63	4llhB	BetP in the outward-facing open state with substrate bound	340	10.4558	5.52583	-
	64	4llhA	BetP in the outward-facing open state with substrate bound	337	10.4558	5.39918	1.20.5.430
	65	4c7rC	BetP trimer in the inward facing conformation in complex with lipids	340	10.1877	5.3653	-
	66	4c7rA	BetP trimer in the inward facing conformation in complex with lipids	340	10.1877	5.38388	1.20.5.430
	67	4ainC	BetP with asymmetric protomers.	340	10.1877	5.35941	-
	68	4c7rB	BetP trimer in the inward facing conformation in complex with lipids	340	10.1877	5.44224	-
	69	4llhC	BetP in an outward-open state with substrate bound	333	10.4558	5.39352	-
	70	4dojC	BetP in outward-facing conformation	335	10.4558	5.44978	-
	71	3p03C	BetP-G153D with choline bound	337	10.4558	5.42316	-
	72	2witB	BetP from C.glutamicum with bound substrate	333	9.65147	5.3567	-
	73	2witA	BetP from C.glutamicum with bound substrate	333	9.65147	5.36004	1.20.5.430
	74	2witC	BetP from C.glutamicum with bound substrate	333	9.65147	5.36701	-
	75	3p03B	BetP mutant G153D with choline bound	320	10.4558	5.34884	-
	76	3p03A	BetP mutant G153D with choline bound	320	10.4558	5.36405	-
	77	4ainB	BetP with asymmetric protomers	340	10.1877	5.27784	-
	78	4ainA	BetP with asymmetric protomers	330	10.1877	5.28129	-
CaiT	79	2wswA	CaiT from P.mirabilis	331	8.31099	4.88578	-
	80	4m8jA	CaiT mutant R262E bound to γ-butyrobetaine	331	8.31099	4.91948	-
	81	2wsxC	CaiT from E.coli	337	7.5067	4.98571	-
	82	2wsxB	CaiT from E.coli	337	7.5067	4.98681	-
	83	2wsxA	CaiT from E.coli	337	7.5067	4.9863	-
	84	3hfxA	CaiT	336	7.7748	4.95437	-
vSGLT	85	2xq2A	vSGLT mutant K294A	274	6.97051	5.66667	1.20.1730.10
(a) The structures are ordered (and numbered) based on a structure-based phylogenetic tree not shown but akin to fig. 6e. (b) The PDB chain identifier includes five characters (four-letter PDB code followed by the chain identifier). (c) Number of aligned residues, which form the core. (d) sequence identity and RMSD with respect to the reference structure, 2A65 (No.13) highlighted in bold face. Le…
