# Supplementary material for: Shared Signature Dynamics Tempered by Local Fluctuations Enables Fold Adaptability and Specificity
Source: Mol Biol Evol. 2019 Apr 27;36(9):2053–68. doi: 10.1093/molbev/msz102 (PMC6736388; doi:10.1093/molbev/msz102)
Supplement: msz102_Supplementary_Data [file msz102_supplementary_data.zip › Table S2-PBP-1.xlsx]

## Sheet: PBP-1
Supplementary Table S2. List of structures in PDB ensemble of PBP-I domain structures retrieved from Dali
Subfamily	Index (a)	PDB chain (b)	Protein name and description	N(c)	Seq Id (%)(d)	RMSD (Å)(d)	CATH ID(e)
delta/AMPA/kainate receptor (non-NMDA iGluR) N-terminal domain (NTD)	1	3h5vA	The GluA2 ATD	376	100	0	3.40.50.2300
	2	4gpaA	The GluA4 N-Terminal Domain (NTD)	371	58	1.5	3.40.50.2300
	3	5fwxB	The AMPA Receptor GluA2/A4 N-Terminal Domain Heterodimer	370	58	1.3	3.40.50.2300
	4	5fwyD	The AMPA Receptor GluA2/A3 N-Terminal Domain Heterodimer	370	58	1.7	3.40.50.2300
	5	4u1xD	Full Length GluA2-Kainate-(R,R)-2B Complex Crystal Form B	367	95	1.7	-
	6	5n6pA	AMPA Receptor NTD Mutant	365	95	1.3	-
	7	3h5wB	The GluA2-ATD In Space Group P212121 Without Solvent	363	98	1.2	3.40.50.2300
	8	3sajA	Glutamate Receptor GluA1 Amino Terminal Domain	357	55	1.9	3.40.50.2300
	9	3sajC	Glutamate Receptor GluA1 Amino Terminal Domain	359	54	1.9	3.40.50.2300
	10	3sajB	Glutamate Receptor GluA1 Amino Terminal Domain	363	58	1.9	3.40.50.2300
	11	3sajD	Glutamate Receptor GluA1 Amino Terminal Domain	364	58	2.1	3.40.50.2300
	12	3om0A	The GluK5 (KA2) ATD Crystallographic Dimer At 1.4 Angstrom Resolution	345	21	2.6	3.40.50.2300
	13	3om1A	The GluK5 (KA2) ATD Dimer At 1.7 Angstrom Resolution	349	20	2.6	3.40.50.2300
	14	3qlvG	The GluK2/GluK5 (GluR6/KA2) ATD Tetramer Assembly	350	20	2.6	3.40.50.2300
	15	3om1B	The GluK5 (KA2) ATD Dimer At 1.7 Angstrom Resolution	344	21	2.2	3.40.50.2300
	16	5kufC	GluK2Em With 2S,4R-4-Methylglutamate	356	28	2.4	-
	17	5kufD	GluK2Em With 2S,4R-4-Methylglutamate	356	28	2.4	-
	18	3qlvJ	The GluK2/GluK5 (GluR6/KA2) ATD Tetramer Assembly	356	28	2.4	3.40.50.2300
	19	5kcaA	The Cbln1 C1Q Domain Trimer In Complex With The Amino-Terminal Domain (ATD) Of iGluR Delta-2 (GluD2)	346	21	3.1	-
	20	5l2eC	Rat Glutamate Receptor Delta-2 (GluD2) Extracellular Domain	349	20	3.1	-
	21	5l2eB	Rat Glutamate Receptor Delta-2 (GluD2) Extracellular Domain	352	21	3.1	-
	22	5kc9A	The Amino-Terminal Domain (ATD) Of iGluR Delta-1 (GluD1)	350	19	3.1	3.40.50.2300
	23	5kc9B	The Amino-Terminal Domain (ATD) Of iGluR Delta-1 (GluD1)	344	20	3	3.40.50.2300
	24	5kc9C	The Amino-Terminal Domain (ATD) Of iGluR Delta-1 (GluD1)	340	20	3.1	3.40.50.2300
	25	3hsyB	A Dimeric GluA2 N-Terminal Domain (NTD)	364	92	1.9	3.40.50.2300
type C GPCR ligand-binding core (LBC)	26	5cniA	Metabotropic Glutamate Receptor Subtype mGlu2 With Glutamate	338	14	3.2	3.40.50.2300
	27	6b7hA	Metabotropic Glutamate Receptor Subtype mGlu3 With An Agonist	334	15	3.4	-
	28	1isrA	Metabotropic Glutamate Receptor Subtype mGlu1 Complexed With Glutamate And Gadolinium Ion	341	14	3.2	3.40.50.2300
	29	6bszB	Metabotropic Glutamate Receptor Subtype mGlu8 Receptor Complexed With Glutamate	340	14	3	-
	30	5fbhB	The Extracellular Domain Of Human Calcium Sensing Receptor With Bound Gd3+	339	12	3.4	3.40.50.2300
	31	5k5sB	The Active Form Of Human Calcium-Sensing Receptor Extracellular Domain	340	12	3.3	-
	32	5x2nA	The Medaka Fish Taste Receptor T1R2A-T1R3 Ligand Binding Domains In Complex With L-Alanine	335	13	2.9	-
	33	5x2nD	The Medaka Fish Taste Receptor T1R2A-T1R3 Ligand Binding Domains In Complex With L-Alanine	334	15	3.2	-
	34	5x2oB	The Medaka Fish Taste Receptor T1R2A-T1R3 Ligand Binding Domains In Complex With L-Arginine	336	15	3	-
	35	5x2pD	The Medaka Fish Taste Receptor T1R2A-T1R3 Ligand Binding Domains In Complex With L-Glutamate	317	14	3.1	-
	36	5x2mB	The Medaka Fish Taste Receptor T1R2A-T1R3 Ligand Binding Domains In Complex With L-Glutamine	340	15	3.1	-
	37	4ms4A	The Extracellular Domain Of Human GABA(B) Receptor Bound To The Agonist Baclofen	337	15	3.5	3.40.50.2300
	38	4ms3A	The Extracellular Domain Of Human GABA(B) Receptor Bound To The Endogenous Agonist GABA	332	14	3.6	3.40.50.2300
unknown	39	3ip9A	Atu2422-GABA Receptor In Complex With GABA	314	12	3.1	3.40.50.2300
Periplasmic binding protein (PBP) for coupling solutes to ABC transporters	40	1z17A	Crystal Structure Analysis Of Periplasmic Leu/Ile/Val-Binding Protein With Bound Ligand Isoleucine	316	12	3.1	3.40.50.2300
	41	4n0qD	An ABC Transporter, Substrate-Binding Protein From Brucella Melitensis 16M In Complex With L-Leucine Using A Crystal Grown In A Crystal Former (Microlytic)	313	12	3.1	3.40.50.2300
	42	4n0qA	An ABC Transporter, Substrate-Binding Protein From Brucella Melitensis 16M In Complex With L-Leucine Using A Crystal Grown In A Crystal Former (Microlytic)	319	11	3.4	3.40.50.2300
	43	4n0qB	An ABC Transporter, Substrate-Binding Protein From Brucella Melitensis 16M In Complex With L-Leucine Using A Crystal Grown In A Crystal Former (Microlytic)	320	12	3.4	3.40.50.2300
	44	3td9A	A Leucine Binding Protein LivK (Tm1135) From Thermotoga Maritima Msb8 At 1.90 A Resolution	324	14	3.1	3.40.50.2300
	45	4rdcA	A Solute-Binding Protein (N280D Mutant) From Anabaena Variabilis Atcc 29413 In Complex With Proline	327	15	3.3	3.40.50.2300
	46	4og2B	A Solute-Binding Protein (N280D Mutant) From Anabaena Variabilis Atcc 29413 In Complex With Leucine	326	15	3.2	3.40.50.2300
	47	4gnrA	1.0 Angstrom Resolution The Branched-Chain Amino Acid Transporter Substrate Binding Protein LivJ From Streptococcus Pneumoniae Str. Canada Mdr_19A In Complex With Isoleucine	314	13	2.9	3.40.50.2300
	48	4q6wA	Periplasmic Binding Protein Type 1 From Bordetella Pertussis Tohama I Complexed With 3-Hydroxy Benzoic Acid	319	9	2.9	3.40.50.2300
	49	4mptB	Periplasmic Binding Protein Type 1 From Bordetella Pertussis Tohama I	316	9	3.2	3.40.50.2300
	50	3tx6A	A Putative ABC-Transporter Periplasmic Component From Rhodopseudomonas Palustris	325	10	2.8	3.40.50.2300
	51	4jb0A	Rhodopseudomonas Palustris (Strain Cga009) Rp1789 Transport Protein	328	10	2.8	3.40.50.2300
	52	3sg0A	An Extracellular Ligand-Binding Receptor From Rhodopseudomonas Palustris Haa2	325	10	3.1	3.40.50.2300
	53	3i45A	Putative Twin-Arginine Translocation Pathway Signal Protein From Rhodospirillum Rubrum Atcc 11170	325	12	2.7	3.40.50.2300
	54	3i09B	A Periplasmic Binding Protein (Bma2936) From Burkholderia Mallei At 1.80 A Resolution	325	10	2.8	3.40.50.2300
	55	4f06A	Solute Binding Protein Of ABC Transporter From Rhodopseudomonas Palustris Haa2 Rpb_2270 In Complex With P- Hydroxybenzoic Acid	326	10	2.7	3.40.50.2300
	56	4ey3A	Solute Binding Protein Of ABC Transporter In Complex With P-Hydroxybenzoic Acid	327	12	2.8	3.40.50.2300
	57	4evqA	ABC Transporter From R. Palustris - Solute Binding Protein (Rpa0668) In Complex With 4-Hydroxybenzoate	323	11	2.8	3.40.50.2300
TR	58	1qo0A	Amide Receptor Of The Amidase Operon Of Pseudomonas Aeruginosa (AmiC) Complexed With The Positive Regulator AmiR.	328	9	3	3.40.50.2300
periplasmic binding protein (PBP)	59	4n03A	Fatty Acid ABC Transporter Substrate-Binding Protein From Thermomonospora Curvata	328	10	3.3	3.40.50.2300
	60	5ereA	Extracellular Ligand Binding Receptor From Desulfohalobium Retbaense Dsm5692	305	11	3
	61	4kv7A	A Possible Leucine/Isoleucine/Valine-Binding Protein From Rhodopirellula Baltica Sh 1	322	10	3.4	3.40.50.2300
	62	4m88A	Extracellular Ligand-Binding Receptor From Verminephrobacter Eiseniae Ef01-2	323	12	3.1	3.40.50.2300
	63	3lopA	Substrate-Binding Periplasmic Protein (Pbp) From Ralstonia Solanacearum	310	11	3	3.40.50.2300
	64	3eafA	ABC Transporter, Substrate Binding Protein Aeropyrum Pernix	336	14	3.2	3.40.50.2300
	65	3lkbB	A Branched Chain Amino Acid ABC Transporter From Thermus Thermophilus With Bound Valine	330	12	2.9	3.40.50.2300
	66	4maaA	The Amino Acid ABC Transporter Substrate-Binding Protein From Pseudomonas Fluorescens Pf-5	324	10	2.8	3.40.50.2300
	67	4zpjA	ABC Transporter Substrate-Binding Protein From Sphaerobacter Thermophilus	326	11	2.8	3.40.50.2300
	68	4xfkA	Leucine-, Isoleucine-, Valine-, Threonine-, And Alanine-Binding Protein From Brucella Ovis	330	10	3	3.40.50.2300
	69	4qwvA	A PBP-Like Protein Built From Fragments Of Different Folds	216	12	3.1
	70	2livA	Periplasmic Binding Protein Structure And Function. Refined X-Ray Structures Of The Leucine/Isoleucine/Valine-Binding Protein And Its Complex With Leucine	271	10	3.5	3.40.50.2300
	71	3nndC	ABC Transporter From Rhodopseudomonas Palustris	210	7	3.8	3.40.50.2300
	72	3nndB	ABC Transporter From Rhodopseudomonas Palustris	213	8	3.6	3.40.50.2300
	73	3nndA	ABC Transporter From Rhodopseudomonas Palustris	214	8	3.7	3.40.50.2300
	74	3nndD	ABC Transporter From Rhodopseudomonas Palustris	214	8	3.5	3.40.50.2300
AMPA Receptor	75	4u5bD	GluA2 A622T, Con-Ikot-Ikot Snail Toxin, Partial Agonist KA And Positive Modulator (R,R)-2B Complex	374	99	0.7	-
PBP	76	4rk5A	LacI Family Transcriptional Regulator From Lactobacillus Casei, Target Efi-512911, With Bound Sucrose	243	12	3.8	3.40.50.2300
	77	3huuD	Transcription Regulator Like Protein From Staphylococcus Haemolyticus	243	9	3.6	3.40.50.2300
	78	3huuC	Transcription Regulator Like Protein From Staphylococcus Haemolyticus	244	11	3.5	3.40.50.2300
Transcription Regulator (TR)	79	3hcwB	Probable Maltose Operon Transcriptional Repressor MalR From Staphylococcus Areus	251	12	3.6	3.40.50.2300
	80	3k4hB	Putative Transcriptional Regulator LacI From Bacillus Cereus Subsp. Cytotoxis Nvh 391-98	245	11	3.2	3.40.50.2300
	81	3k4hA	Putative Transcriptional Regulator LacI From Bacillus Cereus Subsp. Cytotoxis Nvh 391-98	246	11	3.3	3.40.50.2300
	82	4rk6A	LacI Family Transcriptional Regulator Ccpa From Weissella Paramesenteroides, Target Efi-512926, With Bound Glucose	236	9	3.4	3.40.50.2300
	83	3clkA	A Transcription Regulator From Lactobacillus Plantarum	220	14	3.5	3.40.50.2300
	84	3clkB	A Transcription Regulator From Lactobacillus Plantarum	231	12	3.5	3.40.50.2300
	85	3bblA	A Regulatory Protein Of LacI Family From Chloroflexus Aggregans	248	10	3.4	3.40.50.2300
	86	3gv0A	LacI Family Transcription Regulator From Agrobacterium Tumefaciens	247	7	3.7	3.40.50.2300
	87	3cs3A	Sugar-Binding Transcriptional Regulator (LacI Family) From Enterococcus Faecalis	236	11	3.9	3.40.50.2300
	88	3tb6B	The Effector-Binding Domain Of Arabinose Repressor AraR From Bacillus Subtilis	251	8	3.5	3.40.50.2300
	89	3tb6A	The Effector-Binding Domain Of Arabinose Repressor AraR From Bacillus Subtilis	252	6	3.6	3.40.50.2300
	90	3e61A	A Putative Transcriptional Repressor Of Ribose Operon From Staphylococcus Saprophyticus Subsp. Saprophyticus	218	7	3.4	3.40.50.2300
	91	3e61B	A Putative Transcriptional Repressor Of Ribose Operon From Staphylococcus Saprophyticus Subsp. Saprophyticus	226	9	3.6	3.40.50.2300
	92	2rgyA	Transcriptional Regulator Of LacI Family From Burkhoderia Phymatum	240	10	3.8	3.40.50.2300
	93	4rk0A	LacI Family Transcriptional Regulator From Enterococcus Faecalis V583, Target Efi-512923, With Bound Ribose	230	10	3.6	3.40.50.2300
	94	4rk1D	LacI Family Transcriptional Regulator From Enterococcus Faecium, Target Efi-512930, With Bound Ribose	234	12	3.7	3.40.50.2300
	95	4rk0C	LacI Family Transcriptional Regulator From Enterococcus Faecalis V583, Target Efi-512923, With Bound Ribose	232	9	3.7	3.40.50.2300
	96	4rk0D	LacI Family Transcriptional Regulator From Enterococcus Faecalis V583, Target Efi-512923, With Bound Ribose	233	10	3.7	3.40.50.2300
	97	3ctpB	Periplasmic Binding Protein/LacI Transcriptional Regulator From Alkaliphilus Metalliredigens Qymf Complexed With D-Xylulofuranose	245	13	3.8	3.40.50.2300
	98	3o75A	Cra Transcriptional Dual Regulator From Pseudomonas Putida In Complex With Fructose 1-Phosphate	242	10	3.8	3.40.50.2300
	99	3o75B	Cra Transcriptional Dual Regulator From Pseudomonas Putida In Complex With Fructose 1-Phosphate	240	9	3.9	3.40.50.2300
	100	2qu7B	A Putative Transcription Regulator From Staphylococcus Saprophyticus Subsp. Saprophyticus	236	8	4.2	3.40.50.2300
	101	2qu7A	A Putative Transcription Regulator From Staphylococcus Saprophyticus Subsp. Saprophyticus	238	8	4.1	3.40.50.2300
	102	3jvdB	Putative Transcription Regulation Repressor (LacI Family) From Corynebacterium Glutamicum	227	11	3.8	3.40.50.2300
	103	3jvdA	Putative Transcription Regulation Repressor (LacI Family) From Corynebacterium Glutamicum	228	11	3.6	3.40.50.2300
	104	3bilA	A Probable LacI Family Transcriptional Regulator From Corynebacterium Glutamicum	225	13	3.5	3.40.50.2300
	105	3egcE	A Putative Ribose Operon Repressor From Burkholderia Thailandensis	238	8	3.6	3.40.50.2300
	106	3jy6D	LacI Transcriptional Regulator From Lactobacillus Brevis	243	9	3.3	3.40.50.2300
	107	3jy6A	LacI Transcriptional Regulator From Lactobacillus Brevis	243	10	3.3	3.40.50.2300
	108	3jy6C	LacI Transcriptional Regulator From Lactobacillus Brevis	239	9	3.5	3.40.50.2300
	109	4xxhA	Trehalose Repressor From Escherichia Coli	231	9	3.6	3.40.50.2300
	110	4xxhB	Trehalose Repressor From Escherichia Coli	236	10	3.5	3.40.50.2300
	111	2h0aA	Probable Transcription Regulator From Thermus Thermophilus	220	7	3.6	3.40.50.2300
	112	3k9cB	LacI Transcriptional Regulator From Rhodococcus Species.	239	10	3.6	3.40.50.2300
	113	3k9cA	LacI Transcriptional Regulator From Rhodococcus Species.	235	10	3.7	3.40.50.2300
	114	3gybA	A LacI-Family Transcriptional Regulatory Protein From Corynebacterium Glutamicum	227	9	4.1	3.40.50.2300
	115	4kmrB	A Putative Transcriptional Regulator Of LacI Family From Sanguibacter Keddieii Dsm 10542.	232	9	3.9	3.40.50.2300
	116	4kmrA	A Putative Transcriptional Regulator Of LacI Family From Sanguibacter Keddieii Dsm 10542.	234	9	4.1	3.40.50.2300
	117	5ufhA	A LacI-Type Transcription Regulator From Bifidobacterium Animalis Subsp. Lactis Dsm 10140	234	10	3.6	-
	118	4rkrA	LacI Family Transcriptional Regulator From Arthrobacter Sp. Fb24, Target Efi-560007, Complex With Lactose	241	12	3.5	3.40.50.2300
	119	3g85A	LacI Family Transcription Regulator From Clostridium Acetobutylicum	238	6	3.3	3.40.50.2300
	120	3h5tA	A Transcriptional Regulator, Lacl Family Protein From Corynebacterium Glutamicum	230	10	4	1.10.260.40
	121	1jwlB	The Dimeric Lac Repressor/Operator O1/Onpf Complex	244	10	3.2	1.10.260.40
	122	1lbhC	Intact Lactose Operon Repressor With Gratuitous Inducer IPTG	239	10	3.4	3.40.50.2300
	123	4rzsD	Lac Repressor Engineered To Bind Sucralose, Unliganded Tetramer	239	10	3	-
	124	1zvvG	A Ccpa-Crh-DNA Complex	243	10	3.1	1.10.260.40
	125	1zvvB	A Ccpa-Crh-DNA Complex	246	9	3.2	1.10.260.40
	126	2nzvG	Structural Mechanism For The Fine-Tuning Of Ccpa Function By The Small Molecule Effectors G6P And Fbp	245	10	3.1	3.40.50.2300
	127	1sxiL	Apo Transcription Regulator B. Megaterium	244	9	3.4	3.40.50.2300
	128	1sxgI	Structural Studies On The Apo Transcription Factor Form B. Megaterium	247	9	3.5	3.40.50.2300
	129	3c3kA	An Uncharacterized Protein From Actinobacillus Succinogenes	240	8	3.4	3.40.50.2300
	130	3c3kB	An Uncharacterized Protein From Actinobacillus Succinogenes	245	8	3.6	3.40.50.2300
	131	2pugA	The LacI Family Member, PurR, Bound To DNA: Minor Groove Binding By Alpha Helices	233	9	3.5	1.10.260.40
	132	1jh9A	Purine Repressor Mutant-Hypoxanthine-Purf Operator Complex	247	9	3.5	1.10.260.40
	133	3hs3A	Periplasmic Binding Ribose Operon Repressor Protein From Lactobacillus Acidophilus	241	10	3.6	3.40.50.2300
	134	3h5oA	The Transcription Regulator Gntr From Chromobacterium Violaceum	243	5	3.8	3.40.50.2300
	135	3kjxC	A Transcriptional Regulator, Lacl Family Protein From Silicibacter Pomeroyi	244	5	3.5	1.10.260.40
	136	3kjxD	A Transcriptional Regulator, Lacl Family Protein From Silicibacter Pomeroyi	244	5	3.5	1.10.260.40
	137	3e3mD	A LacI Family Transcriptional Regulator From Silicibacter Pomeroyi	239	10	3.2	3.40.50.2300
	138	3d8uA	A PurR Family Transcriptional Regulator From Vibrio Parahaemolyticus Rimd 2210633	236	5	3.6	3.40.50.2300
	139	3d8uB	A PurR Family Transcriptional Regulator From Vibrio Parahaemolyticus Rimd 2210633	240	5	3.5	3.40.50.2300
	140	3dbiB	Sugar-Binding Transcriptional Regulator (LacI Family) From Escherichia Coli Complexed With Phosphate	243	9	3.5	3.40.50.2300
	141	3brqB	The Escherichia Coli Transcriptional Repressor AscG	239	9	3.3	3.40.50.2300
	142	3brqA	The Escherichia Coli Transcriptional Repressor AscG	234	9	3.5	3.40.50.2300
	143	3qk7B	Putative Transcriptional Regulator From Yersinia Pestis Biovar Microtus Str. 91001	240	10	3	3.40.50.2300
	144	4joqB	Putative Ribose ABC Transporter, Periplasmic Solute-Binding Protein From Rhodobacter Sphaeroides	239	10	4.2	3.40.50.2300
	145	4yhsA	An ABC Transporter Solute Binding Protein (Ipr025997) From Bradyrhizobium Sp. Btai1 (Bbta_2440, Target Efi- 511490) With Bound Bis-Tris	244	9	3.8
	146	3o1iC	The Tors Sensor Domain - Tort Complex In The Absence Of Ligand	246	7	3.8	3.40.50.2300
	147	3mizB	A Putative Transcriptional Regulator Protein, Lacl Family From Rhizobium Etli	241	8	3.8	3.40.50.2300
	148	3mizA	A Putative Transcriptional Regulator Protein, Lacl Family From Rhizobium Etli	232	9	3.7	3.40.50.2300
PBP	149	2fw0A	Apo Open Form Of Glucose/Galactose Binding Protein	239	9	4.2	3.40.50.2300
Transcr. Regulator	150	1jhzA	Purine Repressor Mutant Corepressor Binding Domain Structure	223	10	4	3.40.50.2300
	151	1dbqA	DNA-Binding Regulatory Protein	228	11	4.1	3.40.50.2300
	152	1jhzB	Purine Repressor Mutant Corepressor Binding Domain Structure	235	9	4.2	3.40.50.2300
	153	1dbqB	DNA-Binding Regulatory Protein	230	9	4	3.40.50.2300
	154	4o5aA	A LacI Family Transcriptional Regulator From Bifidobacterium Animalis Subsp. Lactis Dsm 10140	245	9	3.3	3.40.50.2300
	155	4wt7A	An ABC Transporter Solute Binding Protein (Ipr025997) From Agrobacterium Vitis (Avi_5165, Target Efi-511223) With Bound Allitol	251	8	3.2	3.40.50.2300
Periplasmic binding protein (PBP) for coupling solutes to ABC transporters	156	3l49C	ABC Sugar Transporter Subunit From Rhodobacter Sphaeroides 2.4.1	247	7	3.2	3.40.50.2300
	157	3c6qD	Apo And Ligand-Bound Form Of A Thermophilic Glucose/Xylose Binding Protein	264	9	3.7	3.40.50.2300
	158	2h3hB	The Liganded Form Of Thermotoga Maritima Glucose Binding Protein	262	10	3.7	3.40.50.2300
	159	4wutA	An ABC Transporter Solute Binding Protein (Ipr025997) From Agrobacterium Vitis (Avi_5133, Target Efi-511220) With Bound D-Fucose	248	8	3.4	3.40.50.2300
	160	5xssA	Xylfii Molecule	240	8	3.4
	161	5hqjA	ABC Transporter Solute Binding Protein B1G1H7 From Burkholderia Graminis C4D1M, Target Efi-511179, In Complex With D-Arabinose	251	7	3.4	3.40.50.2300
	162	3ksmB	ABC-Type Sugar Transport System, Periplasmic Component From Hahella Chejuensis	239	9	3.4	3.40.50.2300
	163	3ksmA	ABC-Type Sugar Transport System, Periplasmic Component From Hahella Chejuensis	241	9	3.6	3.40.50.2300
	164	4ry8C	5-Methylthioribose Transporter Solute Binding Protein Tlet_1677 From Thermotoga Lettingae Tmo Target Efi-511109 In Complex With 5-Methylthioribose	252	8	3.3	3.40.50.2300
	165	4ywhA	An ABC Transporter Solute Binding Protein (Ipr025997) From Actinobacillus Succinogenes 130Z (Asuc_0499, Target Efi-511068) With Bound D-Xylose	259	7	3.6	3.40.50.2300
	166	4ywhB	An ABC Transporter Solute Binding Protein (Ipr025997) From Actinobacillus Succinogenes 130Z (Asuc_0499, Target Efi-511068) With Bound D-Xylose	258	6	3.6	3.40.50.2300
	167	3ma0A	Closed Liganded Xylose Binding Protein From Escherichia Coli	256	7	3.6	3.40.50.2300
	168	4y9tA	An ABC Transporter Solute Binding Protein (Ipr025997) From Agrobacterium Vitis S4 (Avi_5305, Target Efi-511224) With Bound Alpha-D-Glucosamine	263	8	3.5	3.40.50.2300
	169	4yv7A	An ABC Transporter Solute Binding Protein (Ipr025997) From Mycobacterium Smegmatis (Msmei_3018, Target Efi- 511327) With Bound Glycerol	244	9	3.5	3.40.50.2300
	170	3l6uB	ABC-Type Sugar Transport System, Periplasmic Component From Exiguobacterium Sibiricum	239	8	3.5	3.40.50.2300
	171	3l6uA	ABC-Type Sugar Transport System, Periplasmic Component From Exiguobacterium Sibiricum	238	9	3.6	3.40.50.2300
	172	5ix8B	Sugar ABC Transport System, Substrate-Binding Protein From Bordetella Parapertussis 12822	249	8	3.5	3.40.50.2300
	173	5ix8A	Sugar ABC Transport System, Substrate-Binding Protein From Bordetella Parapertussis 12822	251	8	3.4	3.40.50.2300
	174	2x7xA	Fructose Binding Periplasmic Domain Of Hybrid Two Component System Bt1754	246	9	3.5	3.40.50.2300
	175	2x7xB	Fructose Binding Periplasmic Domain Of Hybrid Two Component System Bt1754	243	9	3.3	3.40.50.2300
	176	4yleA	An ABC Transpoter Solute Binding Protein (Ipr025997) From Burkholderia Multivorans (Bmul_1631, Target Efi- 511115) With An Unknown Ligand Modelled As Alpha-D-Erythrofuranose	246	7	3.8	3.40.50.2300
	177	1rpjA	D-Allose Binding Protein From Escherichia Coli	243	7	3.8	3.40.50.2300
	178	5dkvD	An ABC Transporter Solute Binding Protein From Agrobacterium Vitis(Avis_5339, Target Efi-511225) Bound With Alpha-D- Tagatopyranose	252	8	3.8	-
	179	5dkvA	An ABC Transporter Solute Binding Protein From Agrobacterium Vitis(Avis_5339, Target Efi-511225) Bound With Alpha-D- Tagatopyranose	252	8	3.7	-
	180	5dkvB	An ABC Transporter Solute Binding Protein From Agrobacterium Vitis(Avis_5339, Target Efi-511225) Bound With Alpha-D- Tagatopyranose	252	8	3.7	-
	181	4rxtA	Carbohydrate Transporter Solute Binding Protein Arad_9553 From Agrobacterium Radiobacter, Target Efi-511541, In Complex With D-Arabinose	249	10	3.6	3.40.50.2300
	182	5dkvC	An ABC Transporter Solute Binding Protein From Agrobacterium Vitis(Avis_5339, Target Efi-511225) Bound With Alpha-D- Tagatopyranose	250	8	3.6	-
	183	4rxmA	Periplasmic ABC Transporter Solute Binding Protein A7Jw62 From Mannheimia Haemolytica Phl213, Target Efi-511105, In Complex With Myo-Inositol	253	10	3.6	3.40.50.2300
	184	2ioyA	Thermoanaerobacter Tengcongensis Ribose Binding Protein	244	8	3.7	3.40.50.2300
	185	2fn8A	Thermotoga Maritima Ribose Binding Protein Ribose Bound Form	252	8	4	3.40.50.2300
	186	5ibqA	An ABC Solute Binding Protein From Rhizobium Etli Cfn 42 (Rhe_Pf00037,Target Efi-511357) In Complex With Alpha-D-Apiose	250	8	3.8	3.40.50.2300
	187	4ry0A	Ribose Transporter Solute Binding Protein Rhe_Pf00037 From Rhizobium Etli Cfn 42, Target Efi-511357, In Complex With D-Ribose	250	8	3.9	3.40.50.2300
	188	2vk2A	A Galactofuranose Binding Protein	248	9	3.7	3.40.50.2300
	189	4ry9A	Carbohydrate Transporter Solute Binding Protein Veis_2079 From Verminephrobacter Eiseniae Ef01-2, Target Efi-511009, A Complex With D-Talitol	241	10	3.3	3.40.50.2300
	190	5dteC	An ABC Transporter Periplasmic Solute Binding Protein (Ipr025997) From Actinobacillus Succinogenes 130Z(Asuc_0081, Target Efi-511065) With Bound D-Allose	246	9	3.5	3.40.50.2300
	191	5dteA	An ABC Transporter Periplasmic Solute Binding Protein (Ipr025997) From Actinobacillus Succinogenes 130Z(Asuc_0081, Target Efi-511065) With Bound D-Allose	248	9	3.5	3.40.50.2300
	192	4yo7A	An ABC Transporter Solute Binding Protein (Ipr025997) From Bacillus Halodurans C-125 (Bh2323, Target Efi- 511484) With Bound Myo-Inositol	248	10	3.3	3.40.50.2300
	193	2fvyA	Glucose-Bound glucose/galactose-binding protein GGBP	254	9	3.9	3.40.50.2300
	194	1gcaA	Periplasmic Glucose/Galactose Receptor From Salmonella Typhimurium	259	8	3.9	3.40.50.2300
	195	1glgA	Crystallographic Analysis Of The Epimeric And Anomeric Specificity Of The Periplasmic Transport(Slash)Chemotactic Protein Receptor For D-Glucose And D-Galactose	255	9	3.7	3.40.50.2300
	196	3ga5B	X-Ray Glucose/Galactose Receptor From Salmonella Typhimurium In Complex With (2R)-Glyceryl-Beta- D-Galactopyranoside	258	8	4.1	3.40.50.2300
	197	4z0nA	A Periplasmic Solute Binding Protein (Ipr025997) From Streptobacillus Moniliformis Dsm-12112 (Smon_0317, Target Efi- 511281) With Bound D-Galactose	256	8	4	3.40.50.2300
	198	2ipmA	A Disulfide Mutant Glucose Binding Protein	258	9	4.1	3.40.50.2300
	199	4irxA	Caulobacter Myo-Inositol Binding Protein Bound To Myo-Inositol	249	9	3.3	3.40.50.2300
	200	4irxB	Caulobacter Myo-Inositol Binding Protein Bound To Myo-Inositol	252	9	3.4	3.40.50.2300
	201	4rsmA	Carbohydrate Transporter Msmeg_3599 From Mycobacterium Smegmatis Str. Mc2 155, Target Efi-510970, In Complex With D-Threitol	242	8	3.7	3.40.50.2300
	202	4rsmB	Carbohydrate Transporter Msmeg_3599 From Mycobacterium Smegmatis Str. Mc2 155, Target Efi-510970, In Complex With D-Threitol	245	7	3.7	3.40.50.2300
	203	4rsmC	Carbohydrate Transporter Msmeg_3599 From Mycobacterium Smegmatis Str. Mc2 155, Target Efi-510970, In Complex With D-Threitol	245	8	3.6	3.40.50.2300
	204	4rs3A	Carbohydrate Transporter A0Qyb3 From Mycobacterium Smegmatis Str. Mc2 155, Target Efi-510969, In Complex With Xylitol	248	8	3.9	3.40.50.2300
	205	2rjoA	Twin-Arginine Translocation Pathway Signal Protein From Burkholderia Phytofirmans	247	8	3.8	3.40.50.2300
TR	206	3gbvB	A Putative LacI Transcriptional Regulator From Bacteroides Fragilis	253	8	3.3	3.40.50.2300
	207	3gbvA	A Putative LacI Transcriptional Regulator From Bacteroides Fragilis	256	8	3.2	3.40.50.2300
Periplasmic binding protein (PBP) for coupling solutes to ABC transporters	208	3rotB	ABC Sugar Transporter (Periplasmic Sugar Binding Protein) From Legionella Pneumophila	241	7	3.4	3.40.50.2300
	209	3rotA	ABC Sugar Transporter (Periplasmic Sugar Binding Protein) From Legionella Pneumophila	243	7	3.4	3.40.50.2300
	210	4ru1A	Carbohydrate Transporter Acei_1806 From Acidothermus Cellulolyticus 11B, Target Efi-510965, In Complex With Myo-Inositol	250	11	3.5	3.40.50.2300
	211	4ru1I	Carbohydrate Transporter Acei_1806 From Acidothermus Cellulolyticus 11B, Target Efi-510965, In Complex With Myo-Inositol	250	10	3.6	3.40.50.2300
	212	4pe6B	ABC Transporter Solute Binding Protein From Thermobispora Bispora Dsm 43833	242	7	3.8
	213	4pe6A	ABC Transporter Solute Binding Protein From Thermobispora Bispora Dsm 43833	243	8	3.9
	214	3h75A	A Periplasmic Sugar-Binding Protein From The Pseudomonas Fluorescens	244	8	3.7	3.40.50.2300
	215	4wzzA	An ABC Transporter Solute Binding Protein (Ipr025997) From Clostridium Phytofermentas (Cphy_0583, Target Efi- 511148) With Bound L-Rhamnose	263	9	3.7	3.40.50.2300
	216	3brsA	Sugar Transporter From Clostridium Phytofermentans	241	6	3.5	3.40.50.2300
	217	3brsB	Sugar Transporter From Clostridium Phytofermentans	237	5	3.3	3.40.50.2300
	218	5braA	A Putative Periplasmic Solute Binding Protein (Ipr025997) From Ochrobactrum Anthropi Atcc49188 (Oant_2843, Target Efi-511085)	265	8	3.8	3.40.50.2300
	219	4pz0A	A Solute Binding Protein From Bacillus Anthracis Str. Ames In Complex With Quorum-Sensing Signal Autoinducer-2 (Ai-2)	266	11	3.6	3.40.50.2300
	220	1tjyA	Salmonella Typhimurium Ai-2 Receptor LsrB In Complex With R-Thmf	269	10	3.7	3.40.50.2300
	221	3ejwB	The Sinorhizobium Meliloti Ai-2 Receptor, SmLsrB	264	11	3.6	3.40.50.2300
	222	3t95A	LsrB From Yersinia Pestis Complexed With Autoinducer-2	258	9	3.5	3.40.50.2300
	223	3d02A	Periplasmic Sugar-Binding Protein (Yp_001338366.1) From Klebsiella Pneumoniae Subsp. Pneumoniae Mgh 78578 At 1.30 A Resolution	262	8	3.5	3.40.50.2300
	224	4yp9A	LuxP In Complex With A Formose Derived Ai-2 Analogue	238	9	3.3	3.40.50.2300
	225	4yrzA	LuxP In Complex With L-Xylulofuranose-1,2-Borate	243	8	3.3	3.40.50.2300
	226	4yp9B	LuxP In Complex With A Formose Derived Ai-2 Analogue	242	8	3.2	3.40.50.2300
	227	4yrzB	LuxP In Complex With L-Xylulofuranose-1,2-Borate	249	8	3.6	3.40.50.2300
	228	4yr7B	LuxP In Complex With 1-Deoxy-Alpha-L-Xylulofuranose-1,2-Borate	249	8	3.6	3.40.50.2300
	229	2hj9A	The Autoinducer-2-Bound Form Of Vibrio Harveyi LuxP Complexed With The Periplasmic Domain Of LuxQ	242	9	3.5	3.40.50.2300
	230	1jx6A	LuxP From Vibrio Harveyi Complexed With Autoinducer-2	244	8	3.3	3.40.50.2300
	231	4ys6A	An ABC Transporter Solute Binding Protein (Ipr025997) From Clostridium Phytofermentans (Cphy_1585, Target Efi- 511156) With Bound Beta-D-Glucose	248	8	3.9	3.40.50.2300
	232	3uugA	The Periplasmic Sugar Binding Protein ChvE	256	8	4	3.40.50.2300
	233	3urmA	The Periplasmic Sugar Binding Protein ChvE	257	8	4	3.40.50.2300
	234	4wwhA	An ABC Transporter Solute Binding Protein (Ipr025997) From Mycobacterium Smegmatis (Msmeg_1704, Target Efi- 510967) With Bound D-Galactose	254	10	3.9	3.40.50.2300
	235	4wwhB	An ABC Transporter Solute Binding Protein (Ipr025997) From Mycobacterium Smegmatis (Msmeg_1704, Target Efi- 510967) With Bound D-Galactose	257	9	4	3.40.50.2300
	236	4rxuA	Carbohydrate Transporter Solute Binding Protein Caur_1924 From Chloroflexus Aurantiacus, Target Efi-511158, In Complex With D-Glucose	244	8	3.6	3.40.50.2300
	237	5abpA	Substrate Specificity And Affinity Of A Protein (L-arabinose-binding protein) Modulated By Bound Water Molecules	251	10	4.3	3.40.50.2300
	238	9abpA	A Pro To Gly Mutation In The Hinge Of The Arabinose-Binding Protein Enhances Binding And Alters Specificity: Sugar- Binding And Crystallographic Studies	246	10	4.2	3.40.50.2300
	239	1apbA	A Pro To Gly Mutation In The Hinge Of The Arabinose-Binding Protein Enhances Binding And Alters Specificity: Sugar- Binding And Crystallographic Studies	249	8	4.2	3.40.50.2300
	240	7abpA	Sugar-Binding And Crystallographic Studies Of An Arabinose-Binding Protein Mutant (Met108Leu) Which Exhibits Enhanced Affinity And Altered Specificity	247	9	4.1	3.40.50.2300
	241	4kzkA	The Periplasmic L-Arabinose Binding Protein From Burkholderia Thailandensis	247	9	4.2	3.40.50.2300
	242	1bapA	A Pro To Gly Mutation In The Hinge Of The Arabinose-Binding Protein Enhances Binding And Alters Specificity: Sugar- Binding And Crystallographic Studies	250	9	4.3	3.40.50.2300
Transcription Regulator	243	2iksB	N-Terminal Truncated DNA-Binding Transcriptional Dual Regulator From Escherichia Coli K12	243	10	3.7	3.40.50.2300
	244	2iksA	N-Terminal Truncated DNA-Binding Transcriptional Dual Regulator From Escherichia Coli K12	250	10	3.9	3.40.50.2300
	245	3kkeB	A LacI Family Transcriptional Regulator From Mycobacterium Smegmatis	245	12	3.8	3.40.50.2300
	246	2o20G	Transcription Regulator Ccpa Of Lactococcus Lactis	243	9	3.5	3.40.50.2300
	247	2o20C	Transcription Regulator Ccpa Of Lactococcus Lactis	246	10	3.6	3.40.50.2300
	248	2hsgA	Transcription Regulator Ccpa In Its DNA-Free State	244	8	3.6	1.10.260.40
	249	2jcgA	Apo Form Of The Catabolite Control Protein A (Ccpa) From Bacillus Megaterium, With The DNA Binding Domain	243	9	3.6	1.10.260.40
	250	4kqcA	ABC Transporter, LacI Family Transcriptional Regulator From Brachyspira Murdochii	251	11	3.9	3.40.50.2300
PBP	251	3lftA	The ABC Domain In Complex With L-Trp From Streptococcus Pneumonia To 1.35A	248	13	4	3.40.50.2300
	252	3lftB	The ABC Domain In Complex With L-Trp From Streptococcus Pneumonia To 1.35A	238	13	3.9	3.40.50.2300
	253	3lkvA	Conserved Domain Protein From Vibrio Cholerae O1 Biovar Eltor Str. N16961	242	7	3.9	3.40.50.2300
Transcr. Regulator	254	1vpwA	The PurR Mutant, L54M, Bound To Hypoxanthine And Purf Operator DNA	203	11	4.4	1.10.260.40
	255	2pucA	The LacI Family Member, PurR, Bound To DNA: Minor Groove Binding By Alpha Helices	206	10	4.1	1.10.260.40
	256	4fe4B	Apo E. Coli XylR	238	11	4	1.10.10.60
	257	4fe4C	Apo E. Coli XylR	231	12	3.9	1.10.10.60
	258	4fe7A	Xylose-Binding Transcription Activator XylR	239	13	4	1.10.10.60
	259	4fe4A	Apo E. Coli XylR	227	11	3.8	1.10.10.60
PBP	260	2fqxA	Pnra From Treponema Pallidum Complexed With Guanosine	239	5	4.5	3.40.50.2300
	261	2fqwA	Pnra From Treponema Pallidum As Purified From E. Coli (Bound To Inosine)	239	5	4.6	3.40.50.2300
	262	2fqyA	Pnra From Treponema Pallidum Complexed With Adenosine.	244	5	4.7	3.40.50.2300
	263	4pevB	ABC Transporter System Solute-Binding Proteins From Aeropyrum Pernix K1	241	7	4.4	3.40.50.2300
	264	4pevC	ABC Transporter System Solute-Binding Proteins From Aeropyrum Pernix K1	239	7	4.3	3.40.50.2300
	265	3s99A	A Basic Membrane Lipoprotein From Brucella Melitensis, Iodide Soak	227	6	4.4	3.40.50.2300
	266	4iilA	Rfua (Tp0298) Of T. Pallidum Bound To Riboflavin	233	9	4	3.40.50.2300
TR	267	2hqbA	A Transcriptional Activator Of Comk Gene From Bacillus Halodurans	224	11	4.4	3.40.50.2300
Periplasmic binding protein (PBP) for coupling solutes to ABC transporters	268	4kvfA	A Rhamnose ABC Transporter, Periplasmic Rhamnose-Binding Protein From Kribbella Flavida Dsm 17836	259	8	3.9	3.40.50.2300
	269	5bq3D	A Sugar ABC Transporter (Actodo_00688) From Actinomyces Odontolyticus Atcc 17982 At 2.60 A Resolution	268	9	3.8	3.40.50.2300
	270	5bq3A	A Sugar ABC Transporter (Actodo_00688) From Actinomyces Odontolyticus Atcc 17982 At 2.60 A Resolution	265	9	3.9	3.40.50.2300
	271	5bq3C	A Sugar ABC Transporter (Actodo_00688) From Actinomyces Odontolyticus Atcc 17982 At 2.60 A Resolution	264	9	3.8	3.40.50.2300
	272	1tm2A	The Apo Form Of The Salmonella Typhimurium Ai-2 Receptor LsrB	262	10	3.6	3.40.50.2300
	273	3g1wB	Sugar ABC Transporter (Sugar-Binding Protein) From Bacillus Halodurans	257	9	3.7	3.40.50.2300
	274	3g1wA	Sugar ABC Transporter (Sugar-Binding Protein) From Bacillus Halodurans	254	8	3.8	3.40.50.2300
	275	3c6qA	Apo And Ligand-Bound Form Of A Thermophilic Glucose/Xylose Binding Protein	259	11	4	3.40.50.2300
	276	3m9xA	Open Liganded Xylose Binding Protein From Escherichia Coli	247	9	3.9	3.40.50.2300
	277	4kq9A	Periplasmic Ribose ABC Transporter From Conexibacter Woesei Dsm 14684	250	6	3.5	3.40.50.2300
	278	2fn9A	Thermotoga Maritima Ribose Binding Protein Unliganded Form	244	8	3.6	3.40.50.2300
	279	2fn9B	Thermotoga Maritima Ribose Binding Protein Unliganded Form	244	7	3.4	3.40.50.2300
	280	4rweA	A Sugar-Binding Transport Protein From Yersinia Pestis Co92	243	9	4.1	3.40.50.2300
	281	1gudB	Hinge-Bending Motion Of D-Allose Binding Protein From Escherichia Coli: Three Open Conformations	246	7	4.5	3.40.50.2300
	282	5xsdB	XylFII-LytSN Complex Mutant - D103A	233	9	5	-
	283	1gubA	Hinge-Bending Motion Of D-Allose Binding Protein From Escherichia Coli: Three Open Conformations	206	6	3.9	3.40.50.2300
	284	1gudA	Hinge-Bending Motion Of D-Allose Binding Protein From Escherichia Coli: Three Open Conformations	204	6	3.9	3.40.50.2300
	285	1urpA	D-Ribose-Binding Protein From Escherichia Coli	216	8	3.9	3.40.50.2300
	286	1urpB	D-Ribose-Binding Protein From Escherichia Coli	217	8	3.9	3.40.50.2300
	287	1urpC	D-Ribose-Binding Protein From Escherichia Coli	215	7	3.7	3.40.50.2300
	288	5hsgA	An ABC Transporter Solute Binding Protein From Klebsiella Pneumoniae (Kpn_01730, Target Efi-511059), Apo Open Structure	233	10	3.9	3.40.50.2300
	289	1zhhA	The Apo Form Of Vibrio Harveyi LuxP Complexed With The Periplasmic Domain Of LuxQ	247	9	3.6	3.40.50.2300
	290	3qi7A	A Putative Transcriptional Regulator (Yp_001089212.1) From Clostridium Difficile 630 At 1.86 A Resolution	251	11	4.2	3.30.30.130
	291	3qi7B	A Putative Transcriptional Regulator (Yp_001089212.1) From Clostridium Difficile 630 At 1.86 A Resolution	265	10	4.4	3.30.30.130
	292	5xsdA	XylFII-LytSN Complex Mutant - D103A	209	5	4.5	-
	293	1abfA	Substrate Specificity And Affinity Of A Protein (L-arabinose-binding protein) Modulated By Bound Water Molecules	251	10	4.3	3.40.50.2300
type C GPCR LBC	294	3sm9A	Metabotropic Glutamate Receptor mGlu3 Precursor In Presence Of Ly341495 Antagonist	326	14	3.4	3.40.50.2300
	295	5kzqA	Metabotropic Glutamate Receptor mGlu2 In Complex With Antagonist (1S,2R,3S,4S,5R,6R)-2-Amino-3-[(3,4-difluorophenyl)sulfanylmethyl]-4-hydroxy-bicyclo[3.1.0]hexane-2,6-dicarboxylic Acid	328	15	3.2	-
	296	1ewvB	Metabotropic Glutamate Receptor Subtype mGlu1 Ligand Free Form Ii	333	14	3.4	3.40.50.2300
	297	1ewkB	Metabotropic Glutamate Receptor Subtype mGlu1 Complexed With Glutamate	335	14	4.1	3.40.50.2300
	298	1issB	Metabotropic Glutamate Receptor Subtype mGlu1 Complexed With An Antagonist	336	14	3.6	3.40.50.2300
	299	1ewtA	Metabotropic Glutamate Receptor Subtype mGlu1 Ligand Free Form I	334	14	3.1	3.40.50.2300
	300	5c5cA	Human Metabotropic Glutamate Receptor mGlu7, Extracellular Ligand Binding Domain	333	15	3.2	3.40.50.2300
	301	2e4zA	The Ligand-Binding Region Of The Group III Metabotropic Glutamate Receptor mGlu7	331	14	2.8	3.40.50.2300
	302	3mq4A	Metabotropic Glutamate Receptor mGlu7 Complexed With Ly341495 Antagonist	299	14	3.5	3.40.50.2300
	303	4f12A	The Extracellular Domain Of Human GABA(B) Receptor GB2	341	15	3.8	3.40.50.2300
	304	4f11A	The Extracellular Domain Of Human GABA(B) Receptor GB2	343	15	4.3	3.40.50.2300
	305	4ms3B	The Extracellular Domain Of Human GABA(B) Receptor Bound To The Endogenous Agonist GABA	339	14	4.3	3.40.50.2300
	306	4mrmA	The Extracellular Domain Of Human GABA(B) Receptor Bound To The Antagonist Phaclofen	338	15	3.8	3.40.50.2300
	307	5kznA	Metabotropic Glutamate Receptor subunit mGlu2	299	16	4.1
NMDA Receptor (iGluR) NTD	308	5fxjC	GluN1 from GluN1B-GluN2B NMDA Receptor Structure-Class X	260	17	4.2	-
	309	5fxkC	GluN1 from GluN1B-GluN2B NMDA Receptor Structure-Class Y	259	17	4	-
	310	5uowA	GluN1 from Triheteromeric NMDA Receptor GluN1/GluN2A/GluN2B In Complex With Glycine, Glutamate, MK-801 And A GluN2B-Specific Fab, At pH 6.5	278	18	4.7	-
	311	5uowC	GluN1 from Triheteromeric NMDA Receptor GluN1/GluN2A/GluN2B In Complex With Glycine, Glutamate, MK-801 And A GluN2B-Specific Fab, At pH 6.5	276	18	4.7	-
	312	5iouA	GluN1 from GluN1/GluN2B NMDA Receptor In The Glutamate/Glycine-Bound Conformation	256	17	3.8	-
	313	5b3jD	GluN2B from apo GluN1/GluN2B NMDA Receptor NTD dimer	241	12	3.9	3.40.50.2300
	314	5b3jC	GluN1 from apo GluN1/GluN2B NMDA Receptor NTD dimer	242	12	4	3.40.50.2300
	315	3qelB	GluN2B from ifenprodil-bound GluN1/GluN2B NMDA receptor NTD	260	13	4	3.40.50.2300
	316	5ipvD	GluN2B from GluN1/GluN2B NMDA Receptor In The DCKA/D-APV-Bound Conformation, State 1	251	9	3.9	-
Natriuretic peptide receptor (NPR) extracellular domain (ECD)	317	1jdnA	Atrial Natriuretic Peptide Receptor NPR-C	341	13	3.8	3.40.50.2300
	318	3a3kB	Reversibly Bound Chloride In The Atrial Natriuretic Peptide Receptor NPR-A Hormone-Binding Domain	342	13	4	3.40.50.2300
	319	1t34A	Rotation Mechanism For Transmembrane Signaling By The Atrial Natriuretic Peptide Receptor NPR-A	344	13	4.2	3.40.50.2300
	320	3a3kA	Reversibly Bound Chloride In The Atrial Natriuretic Peptide Receptor NPR-A Hormone-Binding Domain	339	13	3.7	3.40.50.2300
	321	1dp4C	Dimerized Hormone Binding Domain Of The Atrial Natriuretic Peptide Receptor NPR-A	338	13	3.6	3.40.50.2300
	322	1dp4A	Dimerized Hormone Binding Domain Of The Atrial Natriuretic Peptide Receptor NPR-A	341	13	3.8	3.40.50.2300
	323	1t34B	Rotation Mechanism For Transmembrane Signaling By The Atrial Natriuretic Peptide Receptor NPR-A	339	13	3.7	3.40.50.2300
	324	1jdpA	Atrial Natriuretic Peptide Receptor NPR-C/Peptide Complex	340	11	3.3	3.40.50.2300
PBP	325	3h5lA	A Putative Branched-Chain Amino Acid ABC Transporter From Silicibacter Pomeroyi	325	10	3.3	3.40.50.2300
	326	3n0wA	A Branched Chain Amino Acid ABC Transporter Periplasmic Ligand-Binding Protein (Bxe_C0949) From Burkholderia Xenovorans Lb400 At 1.88 A Resolution	324	10	3.3	3.40.50.2300
	327	4q6bA	ABC Transporter Substrate-Binding Protein Fromdesulfitobacterium Hafniense Complex With Leu	314	14	3.3	3.40.50.2300
	328	4mlcA	ABC Transporter Substrate-Binding Protein Fromdesulfitobacterium Hafniense	315	14	3.4	3.40.50.2300
	329	3n0xA	An ABC-Type Branched-Chain Amino Acid Transporter (Rpa4397) From Rhodopseudomonas Palustris Cga009 At 1.50 A Resolution	314	10	3.5	3.40.50.2300
GPCR	330	5k5tA	The Inactive Form Of Human Calcium-Sensing Receptor Extracellular Domain	340	12	3.6	-
PBP	331	4ru0A	The ABC Transporter Permease From Pseudomonas Fluorescens Group	328	13	3.7	-
	332	1usgA	L-Leucine-Binding Protein, Apo Form	286	10	5.3	3.40.50.2300
	333	1z15A	Periplasmic Leu/Ile/Val-Binding Protein In Superopen Form	287	10	4.5	3.40.50.2300
	334	2lbpA	The L-Leucine-Binding Protein Refined At 2.4 Angstroms Resolution And Comparison With The Leu/Ile/Val-Binding Protein Structure	306	10	4.8	3.40.50.2300
	335	3hutA	A Putative Branched-Chain Amino Acid ABC Transporter From Rhodospirillum Rubrum	317	13	4.2	3.40.50.2300
TR	336	3ckmA	Lpoa (Yram) C-Domain From Haemophilus Influenzae, A Regulator Of Pbp1A	266	11	4.6	3.40.50.2300
NMDA Receptor (iGluR) NTD	337	5ewlD	GluN2B from Amino Terminal Domains Of The NMDA Receptor Subunit GluN1 And GluN2B In Complex With MK-22	321	13	5.6	3.40.50.2300
	338	5ewjB	GluN2B from Amino Terminal Domains Of The NMDA Receptor Subunit GluN1 And GluN2B In Complex With Ifenprodil	318	14	5.5	3.40.50.2300
	339	4pe5B	GluN2B from GluN1A/GluN2B NMDA Receptor Ion Channel	327	14	5.6	3.40.50.2300
	340	3qemD	GluN2B from Amino Terminal Domains Of The NMDA Receptor Subunit GluN1 And GluN2B In Complex With Ro 25-6981	314	14	5.5	3.40.50.2300
	341	4pe5D	GluN2B from GluN1A/GluN2B NMDA Receptor Ion Channel	325	13	5.5	3.40.50.2300
	342	5ewmD	GluN2B from Amino Terminal Domains Of The NMDA Receptor Subunit GluN1 And GluN2B In Complex With EVT-101	321	14	5.5	3.40.50.2300
	343	3jpwA	Amino Terminal Domain Of The NMDA Receptor Subunit GluN2B	321	14	5.5	3.40.50.2300
	344	3jpyA	The Zinc-Bound Amino Terminal Domain Of The NMDA Receptor Subunit GluN2B	315	15	5.3	3.40.50.2300
	345	5up2D	GluN2B from Triheteromeric NMDA Receptor GluN1/GluN2A/GluN2B In Complex With Glycine, Glutamate, Ro 25-6981, MK-801 And A GluN2B-Specific Fab, At pH 6.5	324	13	5.6	-
	346	4tlmB	GluN2B from GluN1/GluN2B NMDA Receptor, Structure 2	324	13	5.7	3.40.50.2300
	347	4tllB	GluN2B from GluN1/GluN2B NMDA Receptor, Structure 1	324	13	5.6	3.40.50.2300
	348	4tllD	GluN2B from GluN1/GluN2B NMDA Receptor, Structure 1	315	13	5.5	3.40.50.2300
	349	5iovD	GluN2B from GluN1/GluN2B NMDA Receptor In The Glutamate/Glycine/Ro25-6981-Bound Conformation	323	12	5.8	-
	350	5iovB	GluN2B from GluN1/GluN2B NMDA Receptor In The Glutamate/Glycine/Ro25-6981-Bound Conformation	323	12	5.5	-
	351	5up2B	GluN2A from Triheteromeric NMDA Receptor GluN1/GluN2A/GluN2B In Complex With Glycine, Glutamate, Ro 25-6981, MK-801 And A GluN2B-Specific Fab, At pH 6.5	319	11	5.6	-
	352	5uowB	GluN2A from Triheteromeric NMDA Receptor GluN1/GluN2A/GluN2B In Complex With Glycine, Glutamate, MK-801 And A GluN2B-Specific Fab, At pH 6.5	319	13	5.4	-
	353	5tq2B	GluN2A from Amino Terminal Domains Of The NMDA Receptor Subunit GluN1 And GluN2A In Complex With Zinc At GluN1 And GluN2A	302	11	5	3.40.50.2300
	354	5tpwB	GluN2A from Amino Terminal Domains Of The NMDA Receptor Subunit GluN1 And GluN2A In Complex With Zinc At The GluN2A	264	13	4.9	3.40.50.2300
	355	5fxjB	GluN2B from GluN1B-GluN2B NMDA Receptor Structure-Class X	321	13	5.6	-
	356	5fxjD	GluN2B from GluN1B-GluN2B NMDA Receptor Structure-Class X	319	13	5.7	-
	357	5fxgD	GluN2B from GluN1B-GluN2B NMDA Receptor In Active Conformation	321	14	6.4	-
	358	5fxiD	GluN2B from GluN1B-GluN2B NMDA Receptor Structure In Non-Active-2 Conformation	324	15	5.9	-
	359	5fxiB	GluN2B from GluN1B-GluN2B NMDA Receptor Structure In Non-Active-2 Conformation	324	14	6	-
	360	5fxhB	GluN2B from GluN1B-GluN2B NMDA Receptor In Non-Active-1 Conformation	327	15	5.8	-
	361	5fxkD	GluN2B from GluN1B-GluN2B NMDA Receptor Structure-Class Y	321	14	5.9	-
	362	5fxkB	GluN2B from GluN1B-GluN2B NMDA Receptor Structure-Class Y	317	14	6.1	-
	363	5ipvB	GluN2B from GluN1/GluN2B NMDA Receptor In The DCKA/D-APV-Bound Conformation, State 1	313	13	6.3	-
	364	5uowD	GluN2A from Triheteromeric NMDA Receptor GluN1/GluN2A/GluN2B In Complex With Glycine, Glutamate, MK-801 And A GluN2B-Specific Fab, At pH 6.5	320	13	6.2	-
	365	5iouB	GluN2B from GluN1/GluN2B NMDA Receptor In The Glutamate/Glycine-Bound Conformation	314	11	6.2	-
	366	5fxgB	GluN2B from GluN1B-GluN2B NMDA Receptor In Active Conformation	294	13	5.5	-
	367	5iouD	GluN2B from GluN1/GluN2B NMDA Receptor In The Glutamate/Glycine-Bound Conformation	267	12	5.2	-
	368	5fxjA	GluN1 from GluN1B-GluN2B NMDA Receptor Structure-Class X	319	16	5.2	-
	369	5fxhA	GluN1 from GluN1B-GluN2B NMDA Receptor In Non-Active-1 Conformation	323	16	5.3	-
	370	5fxiA	GluN1 from GluN1B-GluN2B NMDA Receptor Structure In Non-Active-2 Conformation	321	17	4.9	-
	371	5fxiC	GluN1 from GluN1B-GluN2B NMDA Receptor Structure In Non-Active-2 Conformation	324	17	5.2	-
	372	5fxkA	GluN1 from GluN1B-GluN2B NMDA Receptor Structure-Class Y	321	17	5	-
	373	5up2A	GluN1 from Triheteromeric NMDA Receptor GluN1/GluN2A/GluN2B In Complex With Glycine, Glutamate, Ro 25-6981, MK-801 And A GluN2B-Specific Fab, At pH 6.5	323	18	5.4	-
	374	5iouC	GluN1 from GluN1/GluN2B NMDA Receptor In The Glutamate/Glycine-Bound Conformation	322	18	5.6	-
	375	4tllA	GluN1 from GluN1/GluN2B NMDA Receptor, Structure 1	325	17	5.3	-
	376	5tpzA	GluN1 from Amino Terminal Domains Of The NMDA Receptor Subunit GluN1 And GluN2B In Apo Closed State	315	17	5.1	3.40.50.2300
	377	5tpwA	GluN1 from Amino Terminal Domains Of The NMDA Receptor Subunit GluN1 And GluN2A In Complex With Zinc At The GluN2A	323	18	5.6	3.40.50.2300
	378	5fxgA	GluN1 from GluN1B-GluN2B NMDA Receptor In Active Conformation	318	16	5.3
	379	5tpzD	GluN2 from Amino Terminal Domains Of The NMDA Receptor Subunit GluN1 And GluN2B In Apo Closed State	264	15	4.9	3.40.50.2300
The structures are ordered and numbered based on the structure-based phylogenetic tree shown in fig. 6e. The PDB chain identifier includes five characters (four-letter PDB code followed by the chain ID). A GluA2 AMPA receptor NTD structure (3H5VA; bold; member 1) was used as a query structure and for the comparisons in columns F and G. Proteins belonging to different functional families are highl…
