# Supplementary material for: Shared Signature Dynamics Tempered by Local Fluctuations Enables Fold Adaptability and Specificity
Source: Mol Biol Evol. 2019 Apr 27;36(9):2053–68. doi: 10.1093/molbev/msz102 (PMC6736388; doi:10.1093/molbev/msz102)
Supplement: msz102_Supplementary_Data [file msz102_supplementary_data.zip › Table S3-TIM barrel.xlsx]

## Sheet: TIM-barrel
Supplementary Table S3. Ensemble of PDB structures with TIM-barrel fold obtained from Dali server
Subfamily	Index(a)	PDB chain(b)	Protein name	N(c)	Seq Id (%)(d)	RMSD (Å)(d)	CATH ID(e)
Aldolase class I (ALD1)	1	4yxgB	Triosephosphate isomerase	230	7.8	5.68	3.20.20.70
	2	3pf3A	Triosephosphate isomerase	247	6.7	5.89	3.20.20.70
	3	1ox4B	Imidazole glycerol phosphate synthase hisHF	191	7.8	4.4	3.20.20.70
	4	4ywiB	Triosephosphate isomerase	243	27.8	3.43	3.20.20.70
	5	4z0jA	Triosephosphate isomerase	242	28.9	2.39	3.20.20.70
	6	2x16A	Triosephosphate isomerase, glycosomal	221	31.7	2.4	3.20.20.70
	7	3a21A	Alpha-galactosidase	187	5.6	3.24	3.20.20.70
	8	1o5kA	4-hydroxy-tetrahydrodipicolinate synthase	187	10	3.96	3.20.20.70
	9	4hnnF	Uncharacterized protein	180	5.6	3.61	3.20.20.70
	10	1wv2A	Thiazole synthase	179	6.1	3.2	3.20.20.70
	11	3c61A	Dihydroorotate dehydrogenase (fumarate)	196	7.8	3.33	3.20.20.70
	12	5e93A	Dihydroorotate dehydrogenase (fumarate)	195	8.3	3.27	3.20.20.70
	13	1bwkA	NADPH dehydrogenase 1	199	8.9	3.08	3.20.20.70
	14	1h62A	Pentaerythritol tetranitrate reductase	199	12.2	3	3.20.20.70
	15	1icpA	12-oxophytodienoate reductase 1	188	8.9	2.86	3.20.20.70
	16	5k1wA	NAD(P)H:flavin oxidoreductase Sye4	185	8.3	3.01	3.20.20.70
	17	1h60A	Pentaerythritol tetranitrate reductase	194	14.4	2.89	3.20.20.70
	18	1vjiA	12-oxophytodienoate reductase 1	188	10	2.95	3.20.20.70
	19	1q45B	12-oxophytodienoate reductase 3	197	11.1	2.81	3.20.20.70
	20	1o94A	Trimethylamine dehydrogenase	199	5.6	3.32	3.20.20.70
	21	2tmdA	Trimethylamine dehydrogenase	202	5.6	3.12	3.20.20.70
	22	1p0kB	Isopentenyl-diphosphate delta-isomerase	185	10.6	2.91	3.20.20.70
	23	1p0kA	Isopentenyl-diphosphate delta-isomerase	187	11.1	2.89	3.20.20.70
	24	1p4cA	(S)-mandelate dehydrogenase	190	8.9	3.01	3.20.20.70
	25	1kbiA	Cytochrome b2, mitochondrial	200	8.9	2.9	3.20.20.70
	26	1tb3A	Hydroxyacid oxidase 2	194	8.3	3.07	3.20.20.70
	27	1ep3A	Dihydroorotate dehydrogenase B (NAD(+)), catalytic subunit	183	13.9	3.13	3.20.20.70
	28	1gthA	Dihydropyrimidine dehydrogenase [NADP(+)]	189	9.4	3.03	3.20.20.70
	29	1f2jA	Fructose-bisphosphate aldolase, glycosomal	213	7.8	3.26	3.20.20.70
	30	2iqtA	Fructose-bisphosphate aldolase class 1	191	10.6	3.08	3.20.20.70
	31	1epxA	Fructose-bisphosphate aldolase	214	8.9	2.73	3.20.20.70
	32	2qapC	Fructose-bisphosphate aldolase	205	7.8	2.79	3.20.20.70
	33	1a5cA	Fructose-bisphosphate aldolase	213	11.1	2.93	3.20.20.70
	34	1adoA	Fructose-bisphosphate aldolase A	212	13.9	2.83	3.20.20.70
	35	2qapB	Fructose-bisphosphate aldolase	214	8.9	2.84	3.20.20.70
	36	2qdgA	Fructose-bisphosphate aldolase	212	9.4	2.81	3.20.20.70
	37	1xfbA	Fructose-bisphosphate aldolase C	208	11.1	2.88	3.20.20.70
	38	1fbaA	Fructose-bisphosphate aldolase	209	12.8	2.86	3.20.20.70
	39	1fdjA	Fructose-bisphosphate aldolase B	208	12.8	2.8	3.20.20.70
	40	1to3A	Sulfofructosephosphate aldolase	181	11.7	3.07	3.20.20.70
	41	2qjiE	2-amino-3,7-dideoxy-D-threo-hept-6-ulosonate synthase	179	7.2	2.87	3.20.20.70
	42	2qjiF	2-amino-3,7-dideoxy-D-threo-hept-6-ulosonate synthase	185	8.3	2.79	3.20.20.70
	43	1ok6A	Fructose-bisphosphate aldolase class 1	184	7.2	3	3.20.20.70
	44	3iv3A	Tagatose 1,6-diphosphate aldolase 2	193	15	2.78	3.20.20.70
	45	4mozC	Fructose-bisphosphate aldolase	179	10.6	2.86	3.20.20.70
	46	3fokA	Uncharacterized protein	190	13.3	2.65	3.20.20.70
	47	2qjiJ	2-amino-3,7-dideoxy-D-threo-hept-6-ulosonate synthase	183	8.9	2.67	3.20.20.70
	48	2qjiC	2-amino-3,7-dideoxy-D-threo-hept-6-ulosonate synthase	183	9.4	2.66	3.20.20.70
	49	2qjgC	2-amino-3,7-dideoxy-D-threo-hept-6-ulosonate synthase	176	9.4	2.57	3.20.20.70
	50	2qjgM	2-amino-3,7-dideoxy-D-threo-hept-6-ulosonate synthase	176	10	2.73	3.20.20.70
	51	2fiqA	D-tagatose-1,6-bisphosphate aldolase subunit GatZ	189	5.6	2.88	3.20.20.70
	52	1rr2A	Methylmalonyl-CoA carboxyltransferase 5S subunit	198	6.1	3.81	3.20.20.70
	53	3bg3A	Pyruvate carboxylase, mitochondrial	194	8.3	3.76	3.20.20.70
	54	1s3hA	Methylmalonyl-CoA carboxyltransferase 5S subunit	192	6.1	3.82	3.20.20.70
	55	2ftpA	3-hydroxy-3-isohexenylglutaryl-CoA/hydroxy-methylglutaryl-CoA lyase	198	11.1	3.17	3.20.20.70
	56	1nvmA	4-hydroxy-2-oxovalerate aldolase	193	11.7	2.78	3.20.20.70
	57	3dxiA	Putative aldolase	181	9.4	3.09	3.20.20.70
	58	1sr9B	2-isopropylmalate synthase	195	6.7	3.33	3.20.20.70
	59	3figB	2-isopropylmalate synthase	197	6.1	3.37	3.20.20.70
	60	1u83A	Phosphosulfolactate synthase	175	7.2	3	3.20.20.70
	61	1qwgA	Phosphosulfolactate synthase	192	10	3.25	3.20.20.70
	62	5lnjA	NADH:flavin oxidoreductase	186	5	3.1	3.20.20.70
	63	1sflB	3-dehydroquinate dehydratase	174	6.7	3.08	3.20.20.70
	64	1qfeA	3-dehydroquinate dehydratase	182	8.3	3.15	3.20.20.70
	65	1r30B	Biotin synthase	205	7.8	3.35	3.20.20.70
	66	3c6cA	Uncharacterized protein	189	6.1	2.93	3.20.20.70
	67	3lotD	Uncharacterized protein	196	4.4	3	3.20.20.70
	68	2nxiA	2-dehydro-3-deoxyphosphooctonate aldolase	192	11.1	2.86	3.20.20.70
	69	1g7vA	2-dehydro-3-deoxyphosphooctonate aldolase	192	8.9	2.88	3.20.20.70
	70	1o60A	2-dehydro-3-deoxyphosphooctonate aldolase	193	7.8	2.94	3.20.20.70
	71	1rzmA	Phospho-2-dehydro-3-deoxyheptonate aldolase	189	13.3	2.93	3.20.20.70
	72	1vliA	Spore coat polysaccharide biosynthesis protein SpsE	192	6.7	2.72	3.20.20.70
	73	4uc5A	Phospho-2-dehydro-3-deoxyheptonate aldolase	193	12.2	2.73	3.20.20.70
	74	1of6A	Phospho-2-dehydro-3-deoxyheptonate aldolase, tyrosine-inhibited	193	10	2.62	3.20.20.70
	75	1k3uA	Tryptophan synthase alpha chain	192	13.3	3.18	3.20.20.70
	76	2tysA	Tryptophan synthase alpha chain	182	12.2	2.93	3.20.20.70
	77	5kzmA	Tryptophan synthase alpha chain	190	11.7	2.99	3.20.20.70
	78	1wq5B	Tryptophan synthase alpha chain	188	11.7	3.14	3.20.20.70
	79	1ujpA	Tryptophan synthase alpha chain	177	13.3	3.02	3.20.20.70
	80	1geqB	Tryptophan synthase alpha chain	185	10.6	3.1	3.20.20.70
	81	1rd5A	Indole-3-glycerol phosphate lyase, chloroplastic	192	16.1	3.06	3.20.20.70
	82	3gayA	Putative fructose-1,6-bisphosphate aldolase	191	16.1	3.18	3.20.20.70
	83	1rv8D	Fructose-1,6-bisphosphate aldolase	193	11.1	3.07	3.20.20.70
	84	1rv8A	Fructose-1,6-bisphosphate aldolase	195	10	3.21	3.20.20.70
	85	1rvgA	Fructose-1,6-bisphosphate aldolase	195	10	3.12	3.20.20.70
	86	1gvfB	D-tagatose-1,6-bisphosphate aldolase subunit KbaY	190	11.7	2.93	3.20.20.70
	87	5u4nA	Fructose-1,6-bisphosphate aldolase	198	15.6	2.96	3.20.20.70
	88	1gvfA	D-tagatose-1,6-bisphosphate aldolase subunit KbaY	184	11.1	2.96	3.20.20.70
	89	3qw4C	Orotidine-5-phosphate decarboxylase/orotate phosphoribosyltransferase, putative	178	7.2	3.13	3.20.20.70
	90	1losA	Orotidine 5'-phosphate decarboxylase	178	11.1	2.96	3.20.20.70
	91	1dqwA	Orotidine 5'-phosphate decarboxylase	180	8.9	3.08	3.20.20.70
	92	1x7fA	Outer surface protein	188	11.1	3.13	3.20.20.70
	93	1dbtA	Orotidine 5'-phosphate decarboxylase	182	6.1	2.95	3.20.20.70
	94	1eixC	Orotidine 5'-phosphate decarboxylase	176	6.7	2.92	3.20.20.70
	95	4ur5A	Probable 5-dehydro-4-deoxyglucarate dehydratase	178	9.4	3.17	3.20.20.70
	96	2v8zA	Putative 2-dehydro-3-deoxy-D-gluconate aldolase YagE	187	10.6	3.09	3.20.20.70
	97	5c54A	Dihydrodipicolinate synthase/N-acetylneuraminate lyase	186	12.2	2.98	3.20.20.70
	98	1f6kA	N-acetylneuraminate lyase	180	14.4	3.04	3.20.20.70
	99	1f73D	N-acetylneuraminate lyase	178	13.9	2.96	3.20.20.70
	100	1f5zA	N-acetylneuraminate lyase	180	14.4	2.99	3.20.20.70
	101	1f74A	N-acetylneuraminate lyase	185	14.4	3.02	3.20.20.70
	102	1fdyA	N-acetylneuraminate lyase	184	13.9	2.93	3.20.20.70
	103	1fdzA	N-acetylneuraminate lyase	183	12.8	2.91	3.20.20.70
	104	1s5tA	4-hydroxy-tetrahydrodipicolinate synthase	177	11.1	2.82	3.20.20.70
	105	1dhpA	4-hydroxy-tetrahydrodipicolinate synthase	178	10.6	2.74	3.20.20.70
	106	1g69B	Thiamine-phosphate synthase	173	11.1	2.71	3.20.20.70
	107	3nl6A	Uncharacterized protein	177	8.9	2.9	3.20.20.70
	108	1kv8B	3-keto-L-gulonate-6-phosphate decarboxylase UlaD	186	11.7	2.82	3.20.20.70
	109	5abtA	1-(5-phosphoribosyl)-5-[(5-phosphoribosylamino)methylideneamino] imidazole-4-carboxamide isomerase	184	10	2.96	3.20.20.70
	110	1vzwA	Phosphoribosyl isomerase A	179	13.9	3.03	3.20.20.70
	111	1qo2A	1-(5-phosphoribosyl)-5-[(5-phosphoribosylamino)methylideneamino] imidazole-4-carboxamide isomerase	186	11.1	2.88	3.20.20.70
	112	1h5yB	Imidazole glycerol phosphate synthase subunit HisF	189	11.1	2.96	3.20.20.70
	113	1ka9F	Imidazole glycerol phosphate synthase subunit HisF	192	7.2	3.02	3.20.20.70
	114	1gpwA	Imidazole glycerol phosphate synthase subunit HisF	188	11.1	2.93	3.20.20.70
	115	1ixnA	Pyridoxine 5'-phosphate synthase	188	13.3	2.95	3.20.20.70
	116	3qjaA	Indole-3-glycerol phosphate synthase	180	13.9	2.69	3.20.20.70
	117	1vc4A	Indole-3-glycerol phosphate synthase	180	13.3	2.73	3.20.20.70
	118	1piiA	Tryptophan biosynthesis protein TrpCF	180	13.9	2.94	3.20.20.70
	119	1i4nA	Indole-3-glycerol phosphate synthase	185	11.7	2.89	3.20.20.70
	120	3tc6A	Indole-3-glycerol phosphate synthase	182	12.8	2.7	3.20.20.70
	121	1lblA	Indole-3-glycerol phosphate synthase	181	11.7	2.73	3.20.20.70
	122	1tqjA	Ribulose-phosphate 3-epimerase	187	12.8	3.23	3.20.20.70
	123	1h1zA	Ribulose-phosphate 3-epimerase, cytoplasmic isoform	186	10	3.28	3.20.20.70
	124	1tqxA	Ribulose-phosphate 3-epimerase	185	11.7	3.03	3.20.20.70
	125	4nu7C	Ribulose-phosphate 3-epimerase	190	13.3	3.16	3.20.20.70
	126	4ml9A	Uncharacterized protein	175	13.9	2.72	3.20.20.70
	127	1e51A	Delta-aminolevulinic acid dehydratase	178	8.3	2.64	3.20.20.70
	128	3obkA	Delta-aminolevulinic acid dehydratase	176	9.4	2.92	3.20.20.70
	129	1vhcF	Putative KHG/KDPG aldolase	174	11.1	2.98	3.20.20.70
	130	1mxsA	2-dehydro-3-deoxy-phosphogluconate aldolase	173	11.1	2.74	3.20.20.70
	131	1eunA	KHG/KDPG aldolase	174	11.7	2.67	3.20.20.70
	132	1jclA	Deoxyribose-phosphate aldolase	186	9.4	2.73	3.20.20.70
	133	3qyqA	Deoxyribose-phosphate aldolase, putative	184	12.2	2.69	3.20.20.70
	134	1mzhA	Deoxyribose-phosphate aldolase	182	6.7	2.84	3.20.20.70
	135	1j2wA	Deoxyribose-phosphate aldolase	180	8.9	2.77	3.20.20.70
	136	2p10C	Mll9387 protein	186	12.2	2.47	3.20.20.70
	137	1w0mA	Triosephosphate isomerase	202	21.1	2.14	3.20.20.70
	138	1hg3A	Triosephosphate isomerase	201	16.1	2.06	3.20.20.70
	139	3s6dA	Putative triosephosphate isomerase	233	23.9	1.62	3.20.20.70
	140	2jgqA	Triosephosphate isomerase	223	25	1.61	3.20.20.70
	141	5ujwF	Triosephosphate isomerase	238	40	1.48	3.20.20.70
	142	5ujwE	Triosephosphate isomerase	240	40	1.38	3.20.20.70
	143	5ujwD	Triosephosphate isomerase	242	40	1.18	3.20.20.70
	144	1mssA	Triosephosphate isomerase, glycosomal	238	47.8	1.31	3.20.20.70
	145	4pcfB	Triosephosphate isomerase, glycosomal	232	46.1	1.64	3.20.20.70
	146	2x1sB	Triosephosphate isomerase, glycosomal	233	45	1.49	3.20.20.70
	147	2y6zA	Triosephosphate isomerase, glycosomal	237	49.4	1.34	3.20.20.70
	148	2wsqD	Triosephosphate isomerase, glycosomal	237	48.3	1.27	3.20.20.70
	149	3krsB	Triosephosphate isomerase	245	42.8	1.07	3.20.20.70
	150	4bi5K	Triosephosphate isomerase	247	42.8	1.08	3.20.20.70
	151	5uprD	Triosephosphate isomerase	245	52.8	1.1	3.20.20.70
	152	2v0tG	Triosephosphate isomerase, glycosomal	245	50	0.91	3.20.20.70
	153	4timB	Triosephosphate isomerase, glycosomal	246	50.6	1.03	3.20.20.70
	154	3q37D	Triosephosphate isomerase, glycosomal	245	48.9	0.84	3.20.20.70
	155	3pvfA	Triosephosphate isomerase	245	43.3	1.13	3.20.20.70
	156	2vfgD	Triosephosphate isomerase	245	43.9	1.08	3.20.20.70
	157	3uwyA	Triosephosphate isomerase	246	39.4	1.25	3.20.20.70
	158	3uwuB	Triosephosphate isomerase	243	40	1.22	3.20.20.70
	159	4y96A	Triosephosphate isomerase	245	43.9	1.06	3.20.20.70
	160	1btmA	Triosephosphate isomerase	245	38.3	1.24	3.20.20.70
	161	4nvtB	Triosephosphate isomerase	242	38.9	1.08	3.20.20.70
	162	4g1kD	Triosephosphate isomerase	236	40.6	1.05	3.20.20.70
	163	3gvgA	Triosephosphate isomerase	246	36.1	1.35	3.20.20.70
	164	4x22A	Triosephosphate isomerase	241	36.7	1.09	3.20.20.70
	165	1tmhA	Triosephosphate isomerase	244	50	1.19	3.20.20.70
	166	1aw2A	Triosephosphate isomerase	244	40	1.15	3.20.20.70
	167	2ypiB	Triosephosphate isomerase	245	53.3	1.07	3.20.20.70
	168	4owgA	Triosephosphate isomerase	245	88.3	0.61	3.20.20.70
	169	4unkB	Triosephosphate isomerase	242	87.2	0.74	3.20.20.70
	170	8timB	Triosephosphate isomerase	247	100	0	3.20.20.70
Glycosidases (GLYC)	171	1qoxA	Beta-glucosidase	207	8.9	3.27	3.20.20.80
	172	1gnxA	Beta-glucosidase	213	7.8	3.41	3.20.20.80
	173	1gonA	Beta-glucosidase	212	8.3	3.28	3.20.20.80
	174	1hjqA	Arabinogalactan endo-beta-1,4-galactanase	197	8.3	3.16	3.20.20.80
	175	1ur0B	Arabinogalactan endo-beta-1,4-galactanase	193	8.9	2.9	3.20.20.80
	176	1fobA	Arabinogalactan endo-beta-1,4-galactanase	193	7.2	2.92	3.20.20.80
	177	1qw9A	Intracellular exo-alpha-(1->5)-L-arabinofuranosidase	210	8.3	3.16	3.20.20.80
	178	1pz2A	Intracellular exo-alpha-(1->5)-L-arabinofuranosidase	213	8.9	3.34	3.20.20.80
	179	4h41A	Uncharacterized protein	187	7.8	3	3.20.20.80
	180	4h41B	Uncharacterized protein	188	8.9	3	3.20.20.80
	181	1qnoA	Mannan endo-1,4-beta-mannosidase A	200	7.8	3.25	3.20.20.80
	182	2epoA	N-acetyl-beta-D-glucosaminidase	185	10	3.12	3.20.20.80
	183	1bqcA	Beta-mannanase	190	5.6	3.28	3.20.20.80
	184	5fl1A	O-GlcNAcase BT_4395	191	6.1	2.99	3.20.20.80
	185	5m7rB	Protein O-GlcNAcase	189	7.8	2.97	3.20.20.80
	186	2v5dA	O-GlcNAcase NagJ	198	8.3	2.92	3.20.20.80
	187	1jneA	Chitinase-like protein Idgf2	191	10.6	3.16	3.20.20.80
	188	1e9lA	Chitinase-like protein 3	188	6.7	3.13	3.20.20.80
	189	1hjwA	Chitinase-3-like protein 1	185	9.4	2.96	3.20.20.80
	190	1o6iB	Chitinase B	192	8.3	2.93	3.20.20.80
	191	1kfwA	Chitinase	193	7.8	3	3.20.20.80
	192	1ljyA	Chitinase-3-like protein 1	191	10.6	2.88	3.20.20.80
	193	1edqA	Chitinase A	194	6.7	2.97	3.20.20.80
	194	1ll7A	Endochitinase 1	193	6.7	2.87	3.20.20.80
	195	1w1yB	Chitinase	195	7.8	3.11	3.20.20.80
	196	4hmcA	Chitinase 60	189	8.3	3.15	3.20.20.80
	197	1kr0A	Hevamine-A	177	6.1	2.99	3.20.20.80
	198	1om0A	Xylanase inhibitor protein 1	181	8.9	3.04	3.20.20.80
	199	1ta3A	Xylanase inhibitor protein 1	185	10	3.22	3.20.20.80
	200	1eomA	Endo-beta-N-acetylglucosaminidase F3	183	9.4	3	3.20.20.80
	201	4ac1X	Endo-N-acetyl-beta-D-glucosaminidase	185	7.2	2.73	3.20.20.80
	202	5kz6A	Extracellular exochitinase Chi36	193	9.4	2.98	3.20.20.80
	203	2wmiA	Fucolectin-related protein	199	5.6	3.21	3.20.20.80
	204	2wmgA	Fucolectin-related protein	198	9.4	3.14	3.20.20.80
	205	2wmhA	Fucolectin-related protein	197	9.4	3	3.20.20.80
	206	2wmiB	Fucolectin-related protein	191	8.3	2.91	3.20.20.80
	207	2wmjA	Fucolectin-related protein	193	8.3	3.14	3.20.20.80
Phosphoenolpyruvate-binding domains (PEPE)	208	3r4iA	Lyase	191	6.1	3.98	3.20.20.60
	209	1oqfA	2-methylisocitrate lyase	177	8.9	3.04	3.20.20.60
	210	2qiwA	PEP phosphonomutase and related enzymes	178	10.6	2.69	3.20.20.60
	211	1igwC	Isocitrate lyase	183	11.1	3	3.20.20.60
	212	1dquA	Isocitrate lyase	183	10.6	2.95	3.20.20.60
	213	3eooF	Methylisocitrate lyase	172	7.2	2.89	3.20.20.60
	214	1mumA	2-methylisocitrate lyase	173	8.3	2.87	3.20.20.60
	215	1pymA	Phosphoenolpyruvate phosphomutase	177	8.3	2.77	3.20.20.60
	216	1m1bA	Phosphoenolpyruvate phosphomutase	177	7.8	2.81	3.20.20.60
	217	5uncA	Uncharacterized protein	175	8.3	2.79	3.20.20.60
	218	3fa3D	Oxaloacetate hydrolase class protein	175	11.7	2.95	3.20.20.60
	219	3fa4B	Oxaloacetate hydrolase class protein	176	11.7	3	3.20.20.60
	220	3fa3A	Oxaloacetate hydrolase class protein	177	11.7	2.97	3.20.20.60
	221	2e28A	Pyruvate kinase	177	8.3	3.49	3.20.20.60
	222	1pklG	Pyruvate kinase	184	10	3.58	3.20.20.60
	223	1pklA	Pyruvate kinase	182	10	3.44	3.20.20.60
	224	1pkyA	Pyruvate kinase I	179	10.6	3.27	3.20.20.60
	225	1a49A	Pyruvate kinase PKM	184	10	3.29	3.20.20.60
	226	1a5uA	Pyruvate kinase PKM	185	10	3.41	3.20.20.60
	227	1aqfA	Pyruvate kinase PKM	182	9.4	3.4	3.20.20.60
	228	1a3wA	Pyruvate kinase 1	181	8.3	3.3	3.20.20.60
	229	1dxeA	5-keto-4-deoxy-D-glucarate aldolase	173	8.9	3.43	3.20.20.60
Dihydropteroate synthase-like (DHP)	230	3noyA	4-hydroxy-3-methylbut-2-en-1-yl diphosphate synthase (flavodoxin)	191	10.6	3.41	3.20.20.20
	231	3noyB	4-hydroxy-3-methylbut-2-en-1-yl diphosphate synthase (flavodoxin)	191	10	3.2	3.20.20.20
	232	4g9pA	4-hydroxy-3-methylbut-2-en-1-yl diphosphate synthase (flavodoxin)	197	11.1	3.19	3.20.20.20
	233	5jq9B	Dihydropteroate synthase	189	11.1	2.99	3.20.20.20
	234	1ad1A	Dihydropteroate synthase	189	6.1	2.82	3.20.20.20
	235	1eyeA	Dihydropteroate synthase	189	12.8	3.06	3.20.20.20
	236	4o0qA	Dihydropteroate synthase DHPS	189	9.4	3.21	3.20.20.20
	237	1f6yA	5-methyltetrahydrofolate:corrinoid/iron-sulfur protein co-methyltransferase	185	7.2	2.99	3.20.20.20
	238	4djeE	Corrinoid/iron-sulfur protein large subunit	189	6.7	2.94	3.20.20.20
	239	4djeC	Corrinoid/iron-sulfur protein large subunit	190	7.8	3.03	3.20.20.20
	240	2h9aA	Carbon monoxide dehydrogenase corrinoid/iron-sulfur protein, gamma subunit	191	8.9	3.08	3.20.20.20
Luciferase-like domain (LUCL)	241	1rhcA	F420-dependent alcohol dehydrogenase	180	8.9	2.94	3.20.20.30
	242	1ezwA	5,10-methylenetetrahydromethanopterin reductase	187	10.6	2.88	3.20.20.30
	243	1f07A	5,10-methylenetetrahydromethanopterin reductase	187	7.8	2.81	3.20.20.30
	244	1yw1A	Putative monooxygenase MoxC	180	11.7	2.82	3.20.20.30
	245	3sdoA	Nitrilotriacetate monooxygenase	188	8.9	3.17	3.20.20.30
	246	3raoB	Bacterial luciferase family protein	185	6.7	2.94	3.20.20.30
Homocysteine-binding-like domain (HCBL)	247	1umyD	Betaine--homocysteine S-methyltransferase 1	191	11.7	2.89	3.20.20.330
	248	1lt8A	Betaine--homocysteine S-methyltransferase 1	194	12.8	2.98	3.20.20.330
	249	1q7qA	5-methyltetrahydrofolate S-homocysteine methyltransferase	187	8.3	2.92	3.20.20.330
	250	4cczA	Methionine synthase	181	7.8	2.86	3.20.20.330
Ribulose bisphosphate carboxylase, large subunit, C-terminal domain (RUB)	251	5iu0A	Ribulose bisphosphate carboxylase large chain	201	8.3	4.91	3.20.20.110
	252	1rscA	Ribulose bisphosphate carboxylase large chain	188	8.3	3.08	3.20.20.110
	253	1telB	Ribulose bisphosphate carboxylase-like protein	196	10.6	3.13	3.20.20.110
	254	2oejA	2,3-diketo-5-methylthiopentyl-1-phosphate enolase	190	8.3	3.12	3.20.20.110
FMN-linked oxidoreductases (FMOR)	255	3vzyB	Heptaprenylglyceryl phosphate synthase	182	10.6	3.33	3.20.20.390
	256	3vzyA	Heptaprenylglyceryl phosphate synthase	178	11.1	3.18	3.20.20.390
	257	3w00A	Heptaprenylglyceryl phosphate synthase	175	12.2	3.25	3.20.20.390
	258	1vizA	Heptaprenylglyceryl phosphate synthase	180	12.8	3.42	3.20.20.390
T220	259	1v93A	Methylenetetrahydrofolate reductase	190	10	2.9	3.20.20.220
	260	1b5tA	5,10-methylenetetrahydrofolate reductase	190	9.4	2.79	3.20.20.220
	261	5umeE	5,10-methylenetetrahydrofolate reductase	189	11.7	2.66	3.20.20.220
T240	262	1i9cB	Glutamate mutase epsilon subunit	204	7.8	3.32	3.20.20.240
	263	1cb7D	Glutamate mutase epsilon subunit	204	7.8	3.3	3.20.20.240
D-Lysine 5,6-aminomutase alpha subunit (LAMA)	264	3koxA	D-ornithine 4,5-aminomutase subunit beta	198	10	3.12	3.20.20.440
	265	1xrsA	Lysine 5,6-aminomutase alpha subunit	200	8.3	3.31	3.20.20.440
T480	266	2qneA	Glycine betaine methyltransferase	204	8.3	3.03	3.20.20.480
	267	4yycA	Methyltransferase	204	5.6	3.01	3.20.20.480
T540	268	3epnA	Phosphomethylpyrimidine synthase	199	5.6	2.99	3.20.20.540
	269	3epoA	Phosphomethylpyrimidine synthase	197	5	2.89	3.20.20.540
Monomethylamine methyltransferase MtmB (MTMB)	270	1l2qA	Monomethylamine methyltransferase MtmB1	205	7.8	4.11	3.20.20.460
	271	1nthA	Monomethylamine methyltransferase MtmB1	204	7.2	4.06	3.20.20.460
Glycoside hydrolase, family 3, N-terminal domain (GHYD)	272	4zm6A	N-acetyl-beta-D glucosaminidase	193	11.2	3.1	3.20.20.300
Copper homeostasis (CutC) domain (CHOM)	273	1twdB	Copper homeostasis protein CutC	179	11.2	2.75	3.20.20.380
N/A	274	3pfpA	Phospho-2-dehydro-3-deoxyheptonate aldolase AroG	196	6.7	5.05	N/A
N/A	275	3kgfA	Phospho-2-dehydro-3-deoxyheptonate aldolase AroG	193	5	4.2	N/A
N/A	276	4xp7A	tRNA-dihydrouridine(20) synthase [NAD(P)+]-like	185	10.6	2.85	N/A
N/A	277	3nueA	Phospho-2-dehydro-3-deoxyheptonate aldolase AroG	195	8.9	3.09	N/A
N/A	278	3nudB	Phospho-2-dehydro-3-deoxyheptonate aldolase AroG	196	8.9	3.2	N/A
N/A	279	5ex4B	Phospho-2-dehydro-3-deoxyheptonate aldolase AroG	194	8.3	3.2	N/A
N/A	280	3nudA	Phospho-2-dehydro-3-deoxyheptonate aldolase AroG	193	8.3	3.17	N/A
N/A	281	4nuzA	Endo-beta-n-acetylglucosaminidase f2	185	10.6	2.92	N/A
N/A	282	5ks8D	Oxaloacetate decarboxylase alpha subunit	192	13.3	3.14	N/A
N/A	283	5ks8F	Oxaloacetate decarboxylase alpha subunit	189	12.2	3.25	N/A
N/A	284	4yx6A	Omega-3 polyunsaturated fatty acid synthase subunit PfaD	192	10.6	3.16	N/A
N/A	285	4cw5B	DfnA	188	9.4	3.24	N/A
N/A	286	5ikyA	Oxalate biosynthetic component 1	199	13.3	3.23	N/A
N/A	287	4s25A	Phosphomethylpyrimidine synthase, chloroplastic	201	8.3	3.05	N/A
N/A	288	4s26B	Phosphomethylpyrimidine synthase, chloroplastic	200	7.8	2.99	N/A
N/A	289	4s26A	Phosphomethylpyrimidine synthase, chloroplastic	201	8.3	2.97	N/A
N/A	290	4qccA	2-dehydro-3-deoxy-6-phosphogalactonate aldolase	176	10.6	2.28	N/A
8TIM (No.170) was selected as the reference structure and is highlighted in bold face. 1,070 PDB chains have been downloaded from the Dali server using an input of PDB chain “8timB” and the refined ensemble contains 290 conformers. The background colors refer to different CATH families, also used in supplementary fig. S1. See also footnote for supplementary table S1.
