# Supplementary material for: Shared Signature Dynamics Tempered by Local Fluctuations Enables Fold Adaptability and Specificity
Source: Mol Biol Evol. 2019 Apr 27;36(9):2053–68. doi: 10.1093/molbev/msz102 (PMC6736388; doi:10.1093/molbev/msz102)
Supplement: msz102_Supplementary_Data [file msz102_supplementary_data.zip › Table S4-CATH.xlsx]

## Sheet: CATH
Supplementary Table S4. CATH superfamilies used in the analysis and their sequence and structure properties in comparison to the indicated reference structure in each superfamily
Name	CATH	Ref PDB structure and chain	N (# of residues)	# of members	M (# of representative members)	<Seq identity>	std(SeqId)	<RMSD> (Å)	std(RMSD) (Å)	<SO3>	std(SO3)	<SO10>	std(SO10)	<SO20>	std(SO20)	<SOall>	std(SOall)
Immunoglobulins	2.60.40.10	4unuA	85	23369	3696	0.0866733	0.0822419	4.39236	0.802229	0.376153	0.0889637	0.369999	0.0506116	0.369101	0.0377359	0.811186	0.0313859
NAD(P)-binding Rossmann-like Domain	3.40.50.720	1hdoA	167	908	419	0.132577	0.073134	4.43085	0.816627	0.45535	0.106406	0.404457	0.0467983	0.364743	0.0351353	0.826241	0.0223182
P-loop containing nucleotide triphosphate hydrolases	3.40.50.300	1byiA	171	272	157	0.16765	0.108717	4.13347	0.683769	0.511204	0.0736973	0.462101	0.0507033	0.430138	0.0400243	0.841701	0.0231476
Trypsin-like serine proteases	2.40.10.10	5avdA	96	2274	149	0.214355	0.129182	3.46216	1.06309	0.519855	0.0937869	0.48576	0.0569097	0.47227	0.0474121	0.853497	0.0349991
Phosphorylase Kinase; domain 1	3.30.200.20	5lvoA	78	5222	1340	0.187512	0.095678	3.57384	0.806355	0.508885	0.122493	0.46977	0.0588628	0.456485	0.0435651	0.849052	0.0330716
Transferase(Phosphotransferase) domain 1	1.10.510.10	5lvoA	154	5447	1435	0.232933	0.0992823	3.81748	0.838641	0.427782	0.112737	0.397805	0.0531193	0.397622	0.038205	0.838013	0.0280452
Aldolase class I	3.20.20.70	2vxnA	195	1281	426	0.094593	0.0862013	4.91634	0.655793	0.513481	0.0545247	0.406748	0.0400153	0.394055	0.0339229	0.827427	0.0208852
Acid Proteases	2.40.70.10	1bxoA	144	888	99	0.250592	0.179117	3.29027	0.846553	0.514152	0.0912135	0.541546	0.0646802	0.488747	0.0454988	0.858547	0.0285759
Winged helix-like DNA-binding domain superfamily/Winged helix DNA-binding domain	1.10.10.10	1xmkA	63	1609	744	0.099988	0.0563401	4.44129	1.11737	0.379278	0.104909	0.350021	0.0592162	0.382224	0.0472519	0.831388	0.0321344
Globins	1.10.490.10	2nrlA	136	2592	251	0.122212	0.0936759	4.15613	1.02339	0.580732	0.0758996	0.485057	0.0480894	0.434492	0.0368552	0.845214	0.0246424
Superfamily 1.20.1260.10	1.20.1260.10	4cvrA	143	2515	94	0.138228	0.125902	3.22608	0.846192	0.485453	0.0739361	0.516392	0.0525642	0.477838	0.0380846	0.855492	0.0266959
Nucleic acid-binding proteins	2.40.50.140	3uljB	59	696	246	0.0929566	0.0765484	4.43849	0.997268	0.332248	0.0972046	0.39504	0.0589413	0.429916	0.0401619	0.821047	0.043111
Vaccinia Virus protein VP39	3.40.50.150	3dlcA	160	722	369	0.122427	0.0732969	4.36882	0.66963	0.39574	0.079408	0.404927	0.0430859	0.376248	0.0317493	0.835544	0.0214745
Type I PLP-dependent aspartate aminotransferase-like (Major domain)	3.40.640.10	2dkjA	206	2301	823	0.117546	0.0637448	4.63584	0.660349	0.460582	0.0687747	0.456662	0.0458276	0.408838	0.0347549	0.828585	0.0224273
Cupredoxins - blue copper proteins	2.60.40.420	2bw4A	118	833	130	0.135183	0.119325	4.56335	1.02456	0.571572	0.0954802	0.451241	0.0479107	0.422663	0.0403415	0.842693	0.030206
Superfamily 3.40.50.2300	3.40.50.2300	2fvyA	133	717	344	0.0957324	0.0649781	4.1966	0.798737	0.492702	0.101534	0.392111	0.0521204	0.373949	0.0426775	0.834091	0.0270787
Superfamily 2.60.120.200	2.60.120.200	2ealA	130	641	92	0.165933	0.157711	3.79499	1.19335	0.494551	0.111136	0.435894	0.0683847	0.422295	0.0547708	0.85505	0.0315964
Aspartate Aminotransferase, domain 1	3.90.1150.10	2w8tA	102	1027	332	0.112632	0.0705362	4.03811	0.7013	0.352422	0.0868946	0.38949	0.0584145	0.383522	0.046511	0.819859	0.0331964
Superfamily 3.30.420.40	3.30.420.40	4cbuA	90	564	89	0.125494	0.128669	4.58336	1.00859	0.384845	0.106728	0.350392	0.0570359	0.357135	0.0414366	0.830127	0.0313135
Retinoid X Receptor	1.10.565.10	4pf3A	221	1733	597	0.215422	0.148503	4.11457	0.942295	0.518198	0.101857	0.498293	0.0495597	0.473371	0.0405862	0.837314	0.0239066
Bromodomain-like	1.20.920.10	5ibnA	106	912	110	0.231008	0.124786	3.08166	0.683264	0.629516	0.099866	0.557313	0.056134	0.511361	0.0422747	0.870887	0.0276695
2-enoyl-CoA Hydratase; Chain A, domain 1	3.90.226.10	5jbxB	145	1277	139	0.196054	0.109616	3.21303	1.12677	0.547406	0.12382	0.4793	0.0486096	0.474172	0.0520865	0.878104	0.0296374
Superfamily 3.40.47.10	3.40.47.10	4dd5A	113	618	85	0.181987	0.121162	3.87695	0.910027	0.460764	0.0906863	0.42483	0.0546562	0.382765	0.0400088	0.85048	0.0256846
EF-hand	1.10.238.10	1psrA	73	876	400	0.173635	0.119397	4.43025	0.937571	0.441449	0.108631	0.475563	0.059421	0.437298	0.0430172	0.824571	0.0357176
DD-peptidase/beta-lactamase superfamily	3.40.710.10	4ua6A	239	1037	233	0.175492	0.143557	4.12266	0.934753	0.625152	0.107016	0.503318	0.0710133	0.479945	0.0608983	0.850622	0.0286675
Phosphatidylinositol 3-kinase Catalytic Subunit; Chain A, domain 1	3.10.20.90	3goeA	64	1187	301	0.116591	0.0945302	3.55746	0.773976	0.390075	0.108534	0.413985	0.0623237	0.411552	0.0439228	0.835326	0.0349814
Superfamily 2.60.120.20	2.60.120.20	1auyA	148	638	64	0.122471	0.130554	4.38579	0.82968	0.552475	0.0775469	0.461571	0.0536553	0.419892	0.0383953	0.827742	0.0263018
Jelly Rolls	2.60.120.10	5k8sB	101	391	124	0.22101	0.134127	3.24061	0.774209	0.507892	0.0973033	0.489487	0.0530061	0.461099	0.0376874	0.863431	0.0260838
Neurotransmitter-gated ion-channel ligand-binding domain	2.70.170.10	2wn9D	183	1507	83	0.259936	0.224579	3.24393	0.612422	0.595329	0.0701164	0.568904	0.0487653	0.542691	0.038531	0.856203	0.0263936
HUPs	3.40.50.620	1n3lA	149	272	113	0.177245	0.159559	3.9532	1.09764	0.543098	0.0958094	0.486151	0.0567504	0.450412	0.047905	0.84075	0.0290398
Glycogen Phosphorylase B;	3.40.50.2000	3t5tB	153	453	186	0.111596	0.0834271	4.27497	0.811986	0.441177	0.126624	0.420189	0.0470966	0.379381	0.0374796	0.841782	0.0251772
MHC class I-like antigen recognition-like	3.30.500.10	1k5nA	180	1399	99	0.198323	0.160133	3.54923	0.83212	0.587028	0.096862	0.57738	0.0673931	0.546701	0.0558361	0.864057	0.0267753
Golgi alpha-mannosidase II	2.60.40.1180	2osxA	67	564	118	0.0909193	0.0859592	4.55226	0.90959	0.37984	0.0854736	0.353506	0.0554232	0.371965	0.0481914	0.828667	0.035951
Cytochrome P450	1.10.630.10	1jfbA	372	1361	660	0.188028	0.111352	4.01518	0.598507	0.63046	0.0643076	0.537559	0.0421152	0.52855	0.0346459	0.847335	0.0179706
Histone, subunit A	1.10.20.10	4cayB	69	918	73	0.198068	0.172322	3.13794	0.808504	0.784724	0.0639087	0.65171	0.0381909	0.608069	0.0283456	0.885599	0.0262153
Superfamily 3.40.50.970	3.40.50.970	5hyvA	161	1144	192	0.140213	0.0970731	4.09713	0.833289	0.510917	0.0988623	0.427772	0.0443152	0.425227	0.0404861	0.844509	0.024983
Superfamily 3.30.70.330	3.30.70.330	1l3kA	71	845	316	0.168015	0.082305	3.20969	0.798971	0.540566	0.100094	0.454734	0.0594272	0.443644	0.0461959	0.863449	0.0301145
Superfamily 1.20.1050.10	1.20.1050.10	4mf5A	100	1360	302	0.12783	0.0733867	3.63528	0.706214	0.54505	0.0700955	0.545126	0.0507738	0.464991	0.0363305	0.862161	0.0260991
Superfamily 2.80.10.50	2.80.10.50	3nbcA	120	1310	390	0.105294	0.0918342	3.91087	0.688949	0.343237	0.111138	0.353143	0.0490166	0.38831	0.0423563	0.826085	0.0387704
5' to 3' exonuclease, C-terminal subdomain	1.10.150.20	3h7iA	54	187	53	0.0934236	0.093403	5.8118	1.33588	0.280715	0.0914902	0.306691	0.0514722	0.345585	0.0363022	0.813215	0.026994
Enolase-like, N-terminal domain	3.30.390.10	1r0mA	95	1213	175	0.180491	0.0933547	3.32112	0.807892	0.4614	0.104635	0.457979	0.0542078	0.476876	0.0479583	0.838064	0.0320082
Enolase-like C-terminal domain	3.20.20.120	4k8gA	219	1151	197	0.186582	0.0833138	3.01091	0.600899	0.677445	0.0894467	0.554845	0.0531331	0.51693	0.0401656	0.871963	0.0208092
Galactose-binding domain-like	2.60.120.260	4bj0A	126	315	161	0.1056	0.114352	4.84676	0.856139	0.449284	0.0826459	0.4131	0.0502061	0.375066	0.0360442	0.823995	0.0284964
Superfamily 3.40.50.1580	3.40.50.1580	4r2xD	221	1214	241	0.18051	0.136701	4.0154	0.793047	0.449776	0.0898589	0.444861	0.0610974	0.41748	0.0483366	0.83643	0.0269902
Aldehyde Dehydrogenase; Chain A, domain 2	3.40.309.10	5jryA	183	1228	80	0.217787	0.125776	3.20864	1.3581	0.604753	0.0923688	0.525598	0.0656695	0.48636	0.0480343	0.867676	0.0261566
Aldehyde Dehydrogenase; Chain A, domain 1	3.40.605.10	5jryA	275	1245	103	0.212545	0.112786	2.83692	0.79975	0.756775	0.0504703	0.645713	0.0440589	0.586796	0.0375192	0.88007	0.0225448
Metal-dependent hydrolases	3.20.20.140	2ob3A	263	511	142	0.109425	0.104938	5.08276	0.803438	0.46441	0.0832572	0.430788	0.0602007	0.395004	0.0476798	0.822324	0.0277031
HAD superfamily/HAD-like	3.40.50.1000	2rbkA	132	1029	341	0.13057	0.0746386	4.12416	0.732489	0.361398	0.102074	0.374351	0.0485974	0.365638	0.0342813	0.834996	0.0283639
Superfamily 3.40.630.30	3.40.630.30	4l8aA	128	917	422	0.122098	0.0709384	4.08875	0.733656	0.392068	0.101433	0.465704	0.0489252	0.448747	0.040788	0.823282	0.0265291
Superfamily 3.40.50.1100	3.40.50.1100	5cgqB	182	379	91	0.222713	0.133405	3.46575	0.702371	0.502848	0.0859275	0.492295	0.0460815	0.45073	0.0321019	0.866335	0.024321
YVTN repeat-like/Quinoprotein amine dehydrogenase	2.130.10.10	2oizA	256	792	340	0.0916462	0.068471	4.49247	0.673722	0.563584	0.0864582	0.427853	0.0538803	0.433996	0.0422638	0.834905	0.0236856
Hotdog Thioesterase	3.10.129.10	4mtuA	103	793	197	0.132833	0.114365	3.35845	0.722202	0.540013	0.0802622	0.498645	0.0580212	0.461419	0.0410002	0.844198	0.0325263
Nitrogenase molybdenum iron protein domain	3.40.50.1980	3u7qA	98	191	52	0.114296	0.101416	5.07172	0.913436	0.393315	0.0886185	0.384697	0.0532019	0.356438	0.0387026	0.812903	0.0333995
Superfamily 2.40.128.20	2.40.128.20	3kffA	142	645	200	0.150926	0.144373	3.93853	0.746362	0.500193	0.115418	0.479329	0.0542309	0.456047	0.0435353	0.84434	0.0257394
Zn peptidases	3.40.630.10	1rtqA	215	586	141	0.119084	0.0995311	4.62118	0.795887	0.394872	0.0914217	0.398031	0.0447137	0.371608	0.0367701	0.83524	0.0210614
Homeodomain-like	1.10.10.60	3a02A	46	862	232	0.0851207	0.0757361	4.76806	1.55227	0.373315	0.11873	0.373076	0.0469478	0.406508	0.0335034	0.826462	0.0305638
Alpha carbonic anhydrase	3.10.200.10	3ks3A	256	906	51	0.284617	0.147742	2.9717	1.04479	0.686832	0.127356	0.552468	0.0672042	0.53239	0.0587346	0.872845	0.0328535
Translation factors	2.40.30.10	3w5hA	97	302	88	0.158113	0.155996	4.00127	1.19093	0.456509	0.0998923	0.451036	0.0663554	0.476133	0.0563868	0.832963	0.0365247
Farnesyl Diphosphate Synthase	1.10.600.10	1wmwB	272	536	312	0.167596	0.149962	4.41417	1.13841	0.607213	0.084755	0.537844	0.0593832	0.491572	0.0461255	0.827758	0.0278073
Superfamily 3.10.450.50	3.10.450.50	1nwwA	118	868	321	0.102437	0.0818324	3.83092	0.719809	0.431967	0.0961145	0.437998	0.0498034	0.431808	0.0404993	0.840757	0.0325917
Glucose-6-phosphate isomerase like protein; domain 1	3.40.50.10490	1vimC	146	651	186	0.14051	0.125448	4.56153	1.03367	0.435548	0.0900432	0.436491	0.0497019	0.398388	0.0386885	0.830563	0.0262505
Superfamily 2.30.42.10	2.30.42.10	4z8jA	77	707	274	0.214212	0.0965415	3.00588	0.668776	0.521462	0.0991166	0.451892	0.0473823	0.461156	0.0360846	0.872928	0.0260033
Pleckstrin-homology domain (PH domain)/Phosphotyrosine-binding domain (PTB)	2.30.29.30	1unqA	95	698	435	0.0973864	0.0750355	3.90048	0.722534	0.469842	0.106843	0.458446	0.0597792	0.416805	0.0416309	0.835985	0.0346982
SH3 Domains	2.30.30.40	2o9sA	55	763	215	0.213964	0.106954	2.96625	0.845142	0.471244	0.128967	0.459201	0.0593305	0.466476	0.0412427	0.86943	0.0351256
Histidine kinase-like ATPase, C-terminal domain	3.30.565.10	5cphA	154	608	144	0.258175	0.172046	3.95895	0.756171	0.552557	0.0954799	0.447408	0.0463304	0.42364	0.0403949	0.848644	0.0255826
Mannose-Binding Protein A, subunit A	3.10.100.10	3wh2A	115	790	150	0.225296	0.110243	2.9831	0.714998	0.434446	0.099163	0.499207	0.0523757	0.462838	0.0408091	0.8723	0.0238745
Laminin	2.10.25.10	3sovA	37	602	135	0.142805	0.0957248	4.02222	0.875111	0.426443	0.0869857	0.37723	0.05314	0.462254	0.0336763	0.839986	0.03845
Superfamily 3.40.50.880	3.40.50.880	5sy4A	168	214	54	0.182031	0.111366	3.42327	0.944045	0.562949	0.142911	0.453487	0.0666335	0.413945	0.0506876	0.861343	0.031802
2,3-Dihydroxybiphenyl 1,2-Dioxygenase, domain 1	3.10.180.10	1nkiA	110	241	115	0.167145	0.124399	3.95289	0.889481	0.455092	0.077921	0.460137	0.0510575	0.444486	0.0408981	0.828978	0.0320648
Tetracycline Repressor, domain 2	1.10.357.10	2zcmA	157	478	315	0.104414	0.0722203	5.03215	0.909912	0.568533	0.0819281	0.521497	0.0407686	0.48932	0.0340801	0.825601	0.0238879
Beta Polymerase, domain 2	3.30.460.10	3hj4A	103	639	145	0.165522	0.167594	4.0784	0.954803	0.431355	0.0950151	0.410954	0.0580913	0.376775	0.0426539	0.827152	0.0349784
Metalloenzyme, LuxS/M16 peptidase-like	3.30.830.10	3go9A	173	635	175	0.105399	0.115229	4.4829	0.86592	0.576757	0.0696561	0.538415	0.0511672	0.483646	0.0361639	0.836024	0.0293356
Superfamily 1.10.520.10	1.10.520.10	3e2oA	140	644	57	0.243871	0.147669	3.69083	0.771196	0.47298	0.110435	0.453109	0.0695779	0.426516	0.0533204	0.851172	0.0307
Medium-chain alcohol dehydrogenases, catalytic domain	3.90.180.10	5dp2A	142	432	157	0.171569	0.100799	4.02248	0.892349	0.553816	0.0808911	0.462876	0.0484124	0.435506	0.0453239	0.852502	0.0259632
Aspartate/ornithine carbamoyltransferase	3.40.50.1370	4oh7A	146	377	103	0.253477	0.155927	3.08585	0.691105	0.573615	0.0936665	0.487398	0.0559988	0.458704	0.0372135	0.864852	0.0215404
Ribosomal protein L6, alpha-beta domain	3.90.930.12	1rl6A	73	700	66	0.174005	0.167131	3.13837	0.77347	0.452988	0.118397	0.39223	0.0720149	0.422923	0.0562577	0.844574	0.0393519
Lactate dehydrogenase/glycoside hydrolase, family 4, C-terminal	3.90.110.10	4plzA	160	719	54	0.230122	0.12682	2.96339	0.614163	0.762854	0.0559664	0.621691	0.0424072	0.545405	0.0298363	0.879185	0.0188572
TPP-binding domain	3.40.50.1220	1q6zA	139	634	150	0.159398	0.123036	4.24024	0.804231	0.393583	0.0775948	0.373867	0.0459419	0.357111	0.0371817	0.836787	0.024754
Superfamily 3.40.50.2020	3.40.50.2020	2dy0B	128	330	184	0.178644	0.118178	3.95979	0.949618	0.504982	0.0886157	0.46819	0.0595337	0.434887	0.0521732	0.848552	0.03339
Superfamily 3.40.50.360	3.40.50.360	3rpeB	140	314	113	0.140944	0.103746	4.07796	0.72135	0.490966	0.0862323	0.440424	0.0512888	0.398179	0.0408375	0.84355	0.0225938
Dihydrofolate Reductase, subunit A	3.40.430.10	1kmvA	157	702	95	0.2465	0.140491	3.52577	1.12233	0.50903	0.0962344	0.482366	0.0579619	0.455949	0.0440557	0.857425	0.0335166
Superfamily 1.25.40.10	1.25.40.10	3ro3A	114	250	119	0.118654	0.0932193	4.18522	1.84451	0.535113	0.0777582	0.530087	0.0651355	0.479149	0.0523239	0.859147	0.0403627
Ribonuclease Z/Hydroxyacylglutathione hydrolase-like	3.60.15.10	3dhaA	171	410	100	0.203333	0.134786	3.50216	0.721082	0.561843	0.0952289	0.487513	0.0638724	0.428426	0.0461712	0.863409	0.0269977
Superfamily 3.30.450.20	3.30.450.20	1nwzA	97	555	258	0.105577	0.081854	4.30219	0.916943	0.294376	0.0944385	0.315824	0.0545242	0.320442	0.038128	0.819349	0.0326298
Superfamily 1.10.8.60	1.10.8.60	5ep2A	63	539	148	0.110253	0.0900875	4.16767	0.816204	0.294841	0.0928363	0.333188	0.0510714	0.32468	0.0326579	0.831474	0.026007
Protein tyrosine phosphatase superfamily	3.90.190.10	4yaaA	244	425	185	0.326705	0.128719	3.05903	0.65349	0.491502	0.0895803	0.55495	0.0515929	0.51404	0.0384331	0.868657	0.0250485
Cyclin-like	1.10.472.10	2i53A	91	363	59	0.136795	0.124166	3.38128	0.678088	0.446241	0.102513	0.453494	0.0526687	0.460527	0.047125	0.847795	0.028436
Superfamily 2.120.10.10	2.120.10.10	2bf6A	326	240	67	0.19271	0.178017	4.00259	0.917237	0.613546	0.0973439	0.479777	0.0640653	0.45071	0.0497207	0.849336	0.0261044
SH2 domain	3.30.505.10	5gjiA	89	548	213	0.24056	0.120669	3.15513	0.856475	0.506855	0.0976401	0.466801	0.0641019	0.468908	0.0562801	0.855639	0.0376065
3'5'-cyclic nucleotide phosphodiesterase, catalytic domain	1.10.1300.10	1tbfA	312	571	67	0.320652	0.201437	3.04302	1.01291	0.686325	0.144039	0.592727	0.0670391	0.607703	0.0573933	0.880716	0.0291966
Avidin-like	2.40.128.30	1tbfA	312	571	67	0.320652	0.201437	3.04302	1.01291	0.686325	0.144039	0.592727	0.0670391	0.607703	0.0573933	0.880716	0.0291966
Superfamily 3.30.70.100	3.30.70.100	2rilA	82	338	143	0.0851215	0.0866238	4.1576	0.796359	0.450135	0.0941956	0.442084	0.0509357	0.417526	0.0417538	0.82125	0.0348107
Phosphoenolpyruvate-binding domains	3.20.20.60	2vwsA	179	432	94	0.222489	0.190156	4.1876	0.872399	0.488479	0.0715918	0.447357	0.058584	0.414756	0.0466317	0.838667	0.0263594
Leucine-rich Repeat Variant	1.25.10.10	4uafB	411	165	55	0.289819	0.244247	3.9953	1.28946	0.839039	0.0507066	0.701301	0.0510166	0.638082	0.0436096	0.876369	0.0269531
lambda repressor-like DNA-binding domains	1.10.260.40	3fymA	64	411	73	0.155512	0.114897	3.5013	1.01797	0.488247	0.119004	0.416983	0.0661111	0.404093	0.0433848	0.847358	0.0396176
Superfamily 2.40.50.40	2.40.50.40	4xdxA	62	412	129	0.183697	0.159603	3.55294	0.885835	0.508294	0.0989011	0.458466	0.0503057	0.454982	0.040338	0.849205	0.0362456
Superfamily 3.40.1190.20	3.40.1190.20	2absA	228	498	198	0.136807	0.0893775	4.51284	0.929768	0.570867	0.0901539	0.477097	0.0595027	0.421903	0.0452454	0.835274	0.0263017
Tubulin/FtsZ, GTPase domain	3.40.50.1440	4i4tB	246	432	67	0.266956	0.180057	3.71224	0.706883	0.654872	0.0689244	0.576128	0.0521673	0.526497	0.0408099	0.857333	0.022792
Superfamily 1.10.287.70	1.10.287.70	3oufB	79	432	75	0.208806	0.187942	3.68555	0.830715	0.53856	0.0859683	0.5159	0.0545893	0.46943	0.0484399	0.857864	0.0326825
Ribonuclease A-like domain	3.10.130.10	1dy5A	122	584	52	0.277449	0.165479	3.95026	1.60129	0.551654	0.0878547	0.514603	0.0630704	0.447932	0.0652263	0.833501	0.0795081
ATP-grasp fold, A domain	3.30.1490.20	1kjqB	58	462	173	0.160498	0.105121	3.66764	0.786727	0.352166	0.0903211	0.328601	0.0486709	0.389402	0.0420369	0.831605	0.0374805
Nucleoside Triphosphate Pyrophosphohydrolase	3.90.79.10	3x0jA	125	521	256	0.160006	0.0849461	3.93042	0.660892	0.385298	0.0949113	0.456867	0.0463931	0.429383	0.0360566	0.837609	0.025387
Superfamily 2.40.50.100	2.40.50.100	2evbA	62	316	83	0.12811	0.118472	4.37801	1.45111	0.437984	0.0996119	0.411699	0.0689063	0.415236	0.0454895	0.855051	0.0329522
Tubulin/FtsZ, C-terminal domain	3.30.1330.20	3c8lB	83	357	91	0.163361	0.185893	4.74283	0.95108	0.362105	0.0822328	0.378724	0.0595267	0.361565	0.0402936	0.815876	0.0358717
NADP-dependent oxidoreductase domain	3.20.20.100	1us0A	291	547	102	0.261656	0.139962	3.42705	0.81655	0.597416	0.077424	0.523621	0.0505267	0.5188	0.044798	0.860188	0.0250492
RNA polymerase, RBP11-like subunit	3.30.1360.10	1xppD	80	345	53	0.327021	0.225652	3.34947	0.72733	0.583862	0.071635	0.501068	0.0486653	0.465957	0.0388753	0.856001	0.0289961
Ankyrin repeat-containing domain	1.25.40.20	5d66A	151	334	65	0.263356	0.124719	3.21263	0.899678	0.637293	0.094141	0.562632	0.0710261	0.518663	0.0569688	0.877238	0.0293435
Complement Module, domain 1	2.10.70.10	4k12A	52	422	185	0.176773	0.0943983	3.69858	0.821489	0.434465	0.080976	0.379806	0.0449155	0.420602	0.0366109	0.839068	0.0318755
Superfamily 3.40.50.20	3.40.50.20	4ea9A	71	281	72	0.126795	0.120924	4.13747	0.85764	0.477874	0.093561	0.38264	0.0519234	0.373657	0.0393954	0.844316	0.0238708
Rhopdopsin 7-helix transmembrane proteins	1.20.1070.10	5ax0A	218	293	64	0.261152	0.187059	3.61023	1.21071	0.517134	0.113338	0.559505	0.0758482	0.52104	0.0614313	0.859733	0.0330434
Superfamily 1.10.8.50	1.10.8.50	1mu5A	61	403	61	0.333887	0.238818	3.23671	1.05754	0.419566	0.112669	0.412312	0.040715	0.406701	0.0289903	0.875551	0.0288866
Ribonucleotide Reductase, subunit A	1.10.620.20	1mxrA	262	308	57	0.154583	0.174692	3.98163	1.09667	0.484092	0.109396	0.517469	0.0701774	0.481749	0.0579509	0.844962	0.0346106
Superfamily 3.10.450.40	3.10.450.40	3wa2X	90	445	61	0.0988455	0.138059	5.50239	1.21161	0.489123	0.109336	0.415841	0.0518351	0.394645	0.0398236	0.810776	0.0382839
Superfamily 3.10.20.30	3.10.20.30	3wcqA	78	270	83	0.143327	0.127751	4.2728	1.1256	0.381052	0.122208	0.36288	0.0530937	0.362211	0.0380693	0.836627	0.0375497
Superfamily 3.30.300.20	3.30.300.20	3eerA	67	447	106	0.195466	0.197884	3.80554	0.890403	0.530906	0.131288	0.447077	0.0674961	0.411026	0.0435002	0.845927	0.0317672
Superfamily 2.60.120.40	2.60.120.40	4ousA	117	418	136	0.184966	0.133444	3.84464	0.792435	0.449305	0.10104	0.391214	0.0604888	0.382741	0.0423212	0.827417	0.0340858
Total number of proteins					26899
